# Supplementary material
Source: PubMed Central journal article supplement (PMC5579384)

Fig 1B. dmc1 DBF4. Cdc5

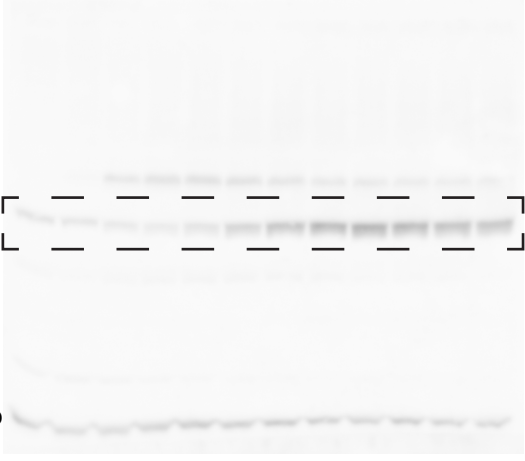

Fig 1B. dmc1 E86K. Cdc5

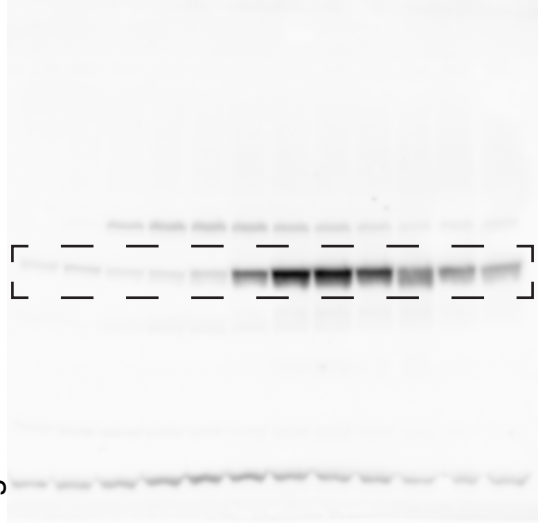

Fig 1B. dmc1 R83E. Cdc5

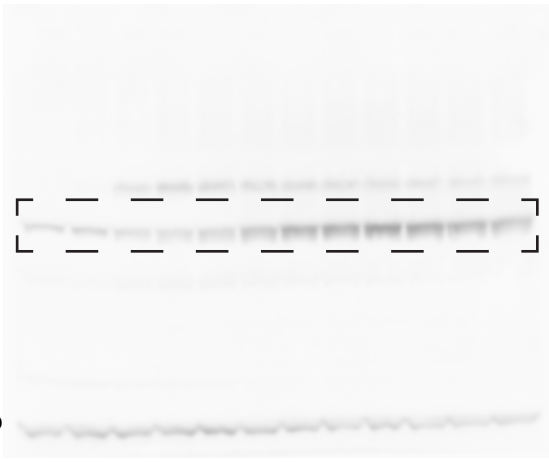

Fig 1B. dmc1 E86V. Cdc5

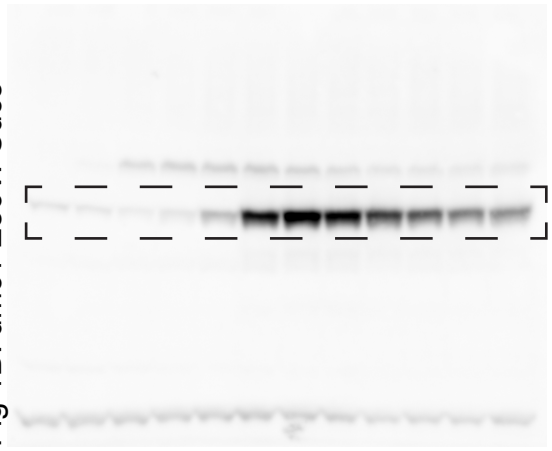

Fig 1B. dmc1 DBF4. Dbf4

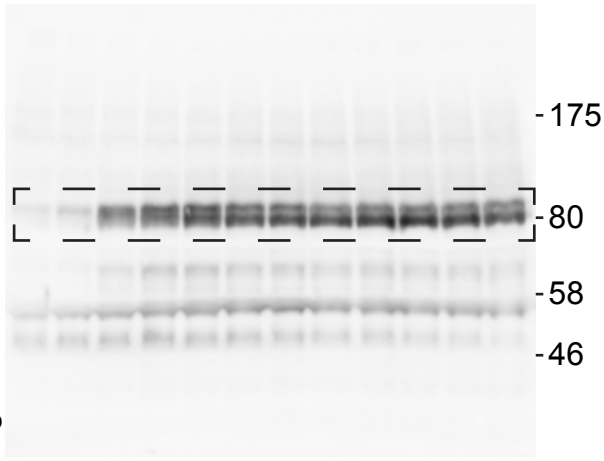

Fig 1B. dmc1 E86K. Dbf4

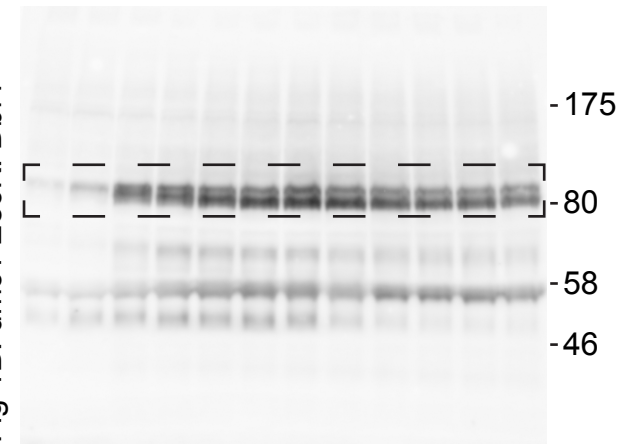

Fig 1B. dmc1 R83E. Dbf4

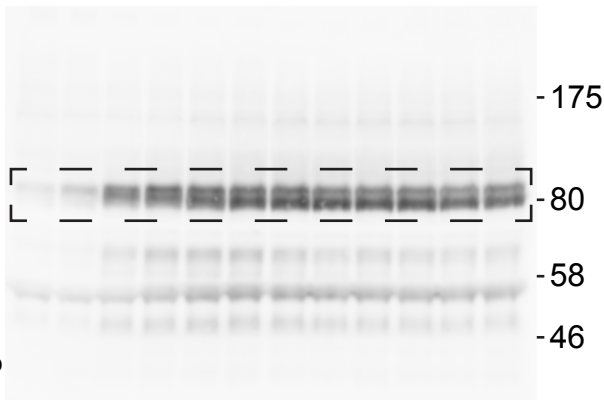

Fig 1B. dmc1 E86V. Dbf4

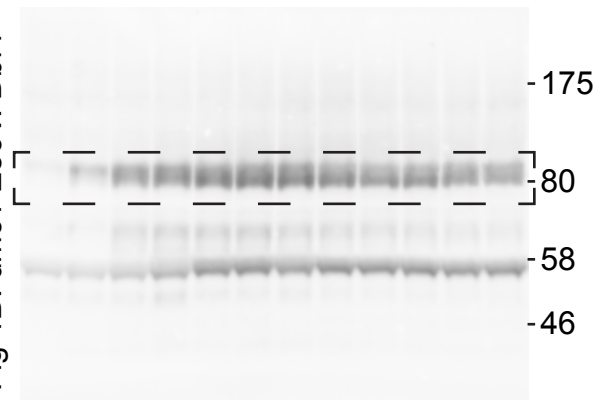

Fig 1B. dmc1 DBF4. Ndt80

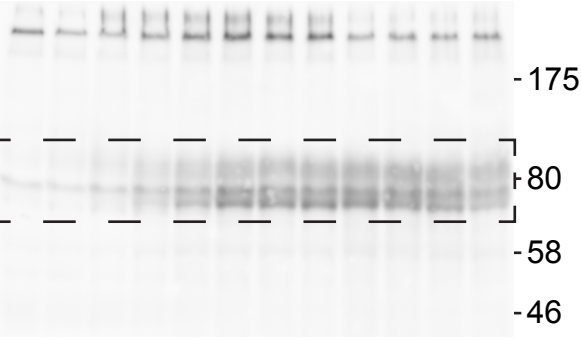

Fig 1B. dmc1 E86K. Ndt80

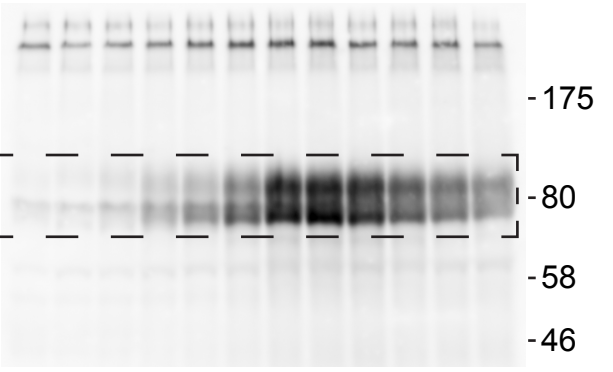

Fig 1B. dmc1 R83E. Ndt80

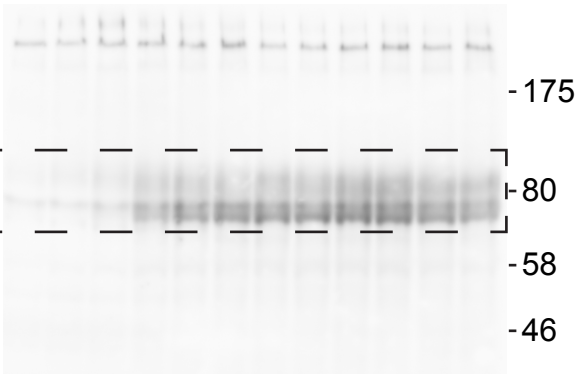

Fig 1B. dmc1 E86V. Ndt80

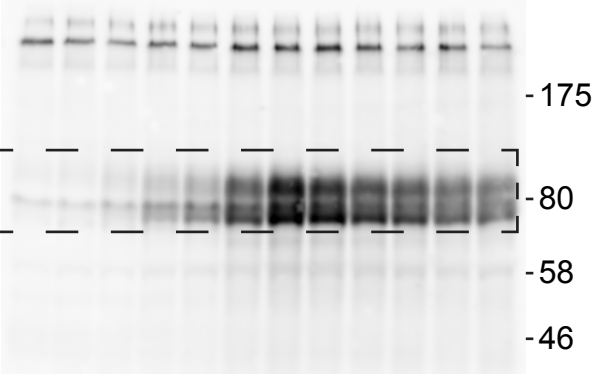

Fig 1B. dmc1 DBF4. Red1

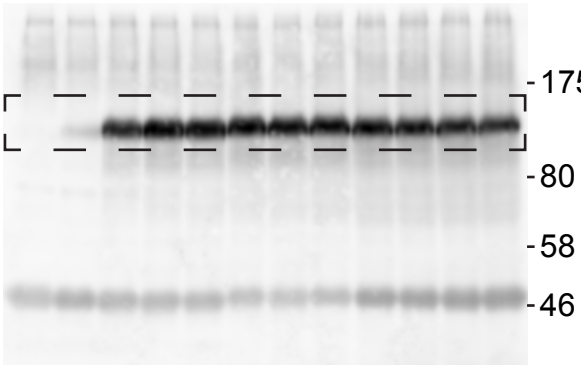

Fig 1B. dmc1 E86K. Red1

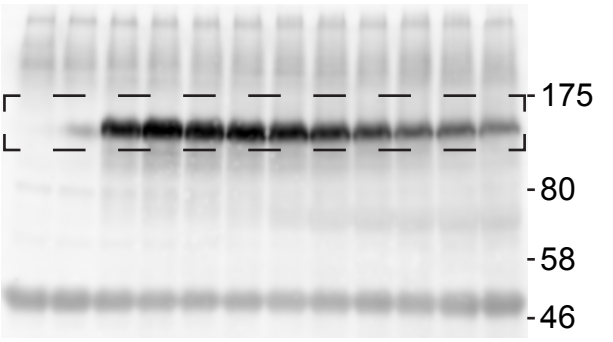

Fig 1B. dmc1 R83E. Red1

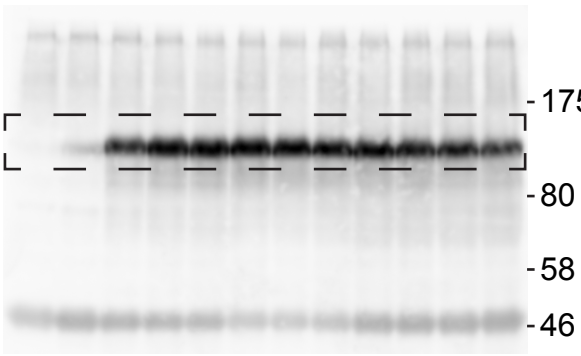

Fig 1B. dmc1 E86V. Red1

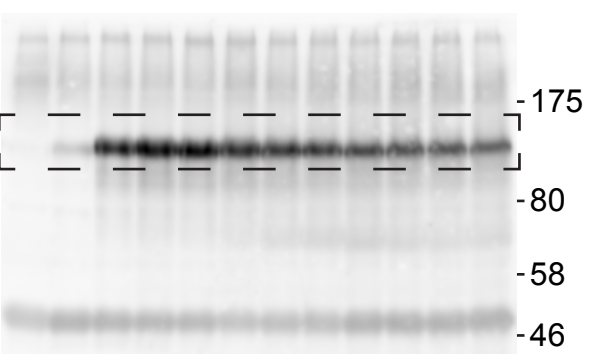

Fig 1B. dmc1 DBF4. Zip1

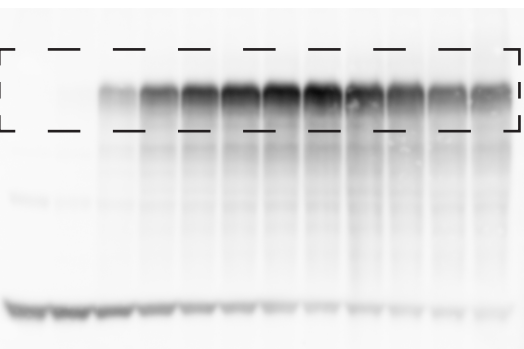

Fig 1B. dmc1 E86K. Zip1

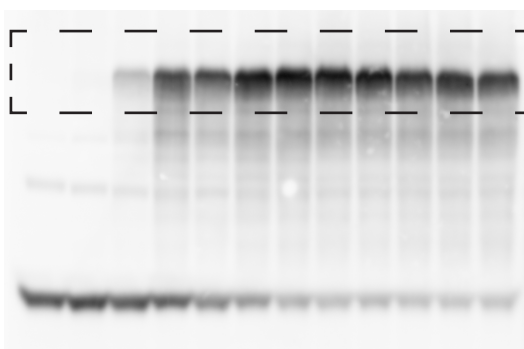

Fig 1B. dmc1 R83E. Zip1

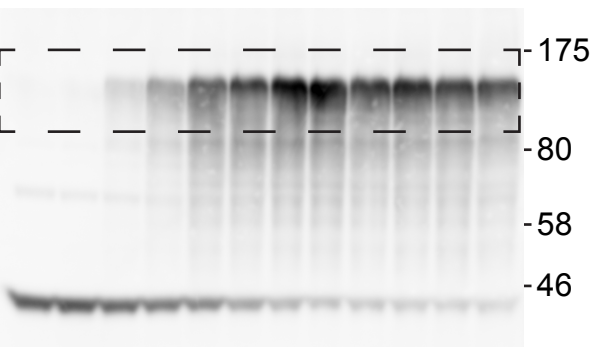

Fig 1B. dmc1 E86V. Zip1

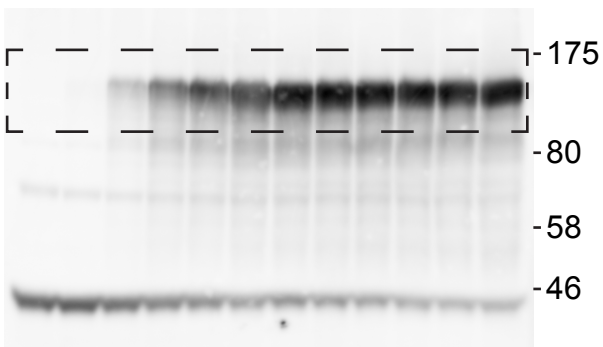

Fig 1D. WCE. Cdc5

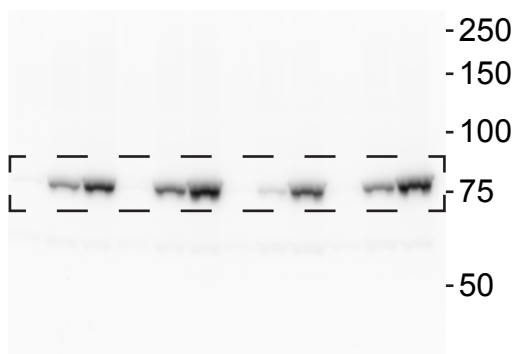

Fig 1D. WCE. Dbf4

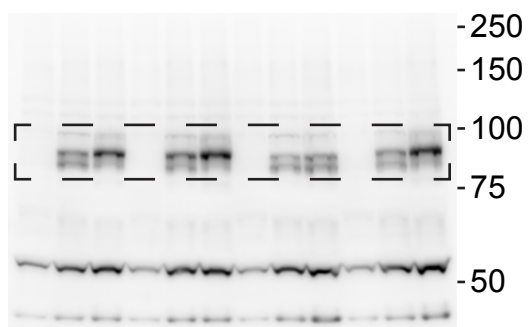

Fig 1D. WCE. V5, Pgl1

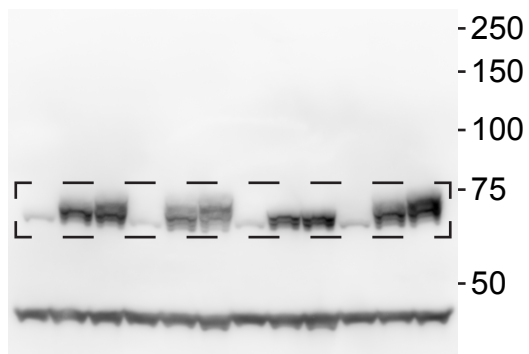

Fig 1D. IP. V5

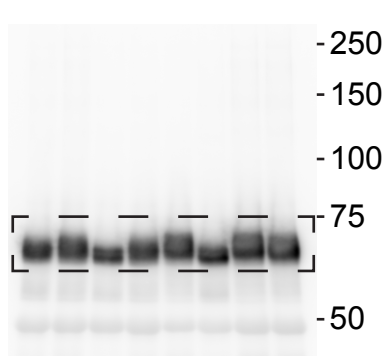

Fig 1D. IP. Dbf4

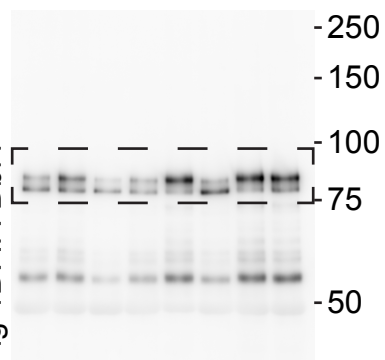

Fig 1D. IP. Cdc5

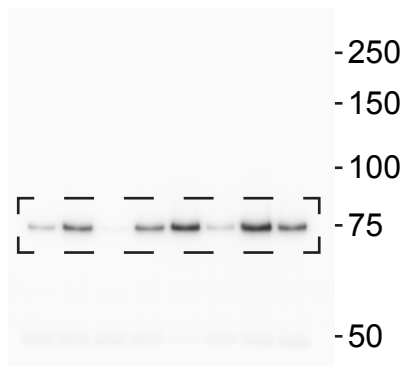

Supplement: EMBJ-36-2488-s003.pdf [file EMBJ-36-2488-s003.pdf]
