# Supplementary material
Source: PubMed Central journal article supplement (PMC5579384)

Fig 3C. dmc1 ndt80 DBF4 -

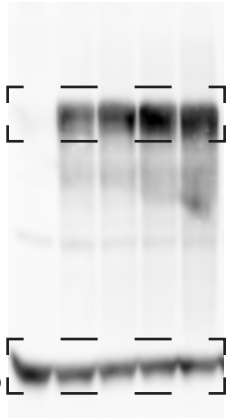

Fig 3C. dmc1 ndt80 DBF4 CDC5

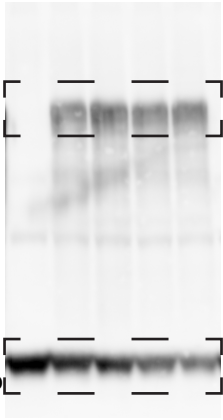

Fig 3C. dmc1 ndt80 E86K CDC5

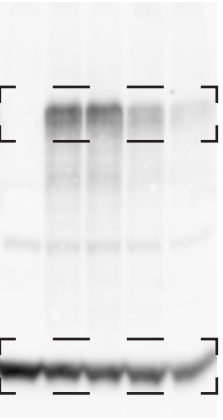

Fig 3C. dmc1ndt80 R83E CDC5

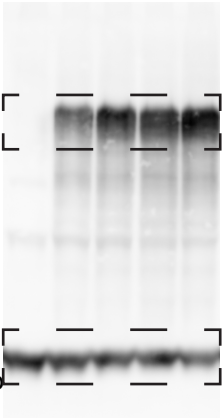

Fig 3C. dmc1 ndt80 E86V CDC5

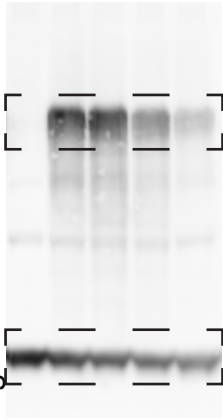

Fig 3C. dmc1 ndt80 DBF4 -

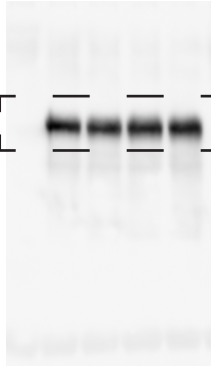

Fig 3C. dmc1 ndt80 DBF4 CDC5

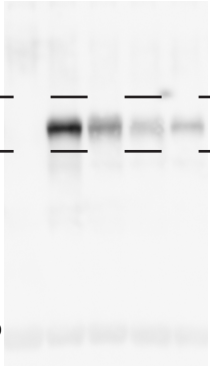

Fig 3C. dmc1 ndt80 E86K CDC5

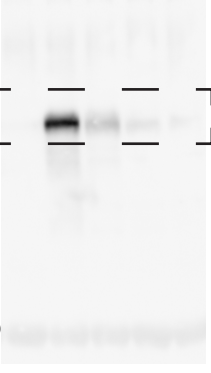

Fig 3C. dmc1ndt80 R83E CDC5

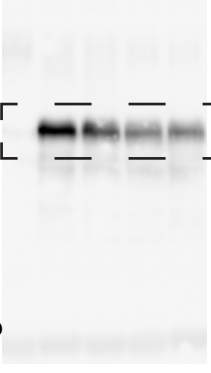

Fig 3C. dmc1 ndt80 E86V CDC5

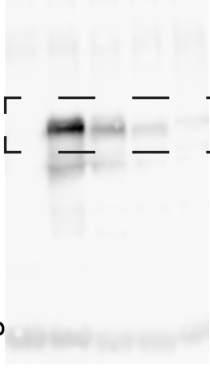

Fig 3C. dmc1 ndt80 DBF4 -

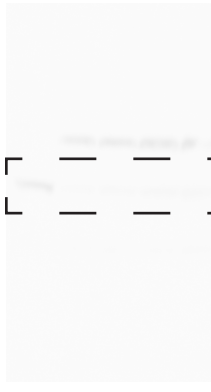

Fig 3C. dmc1 ndt80 DBF4 CDC5

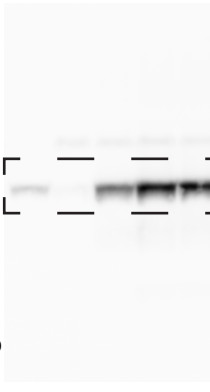

Fig 3C. dmc1 ndt80 E86K CDC5

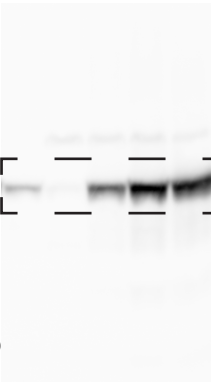

Fig 3C. dmc1ndt80 R83E CDC5

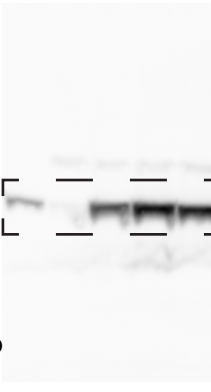

Fig 3C. dmc1 ndt80 E86V CDC5

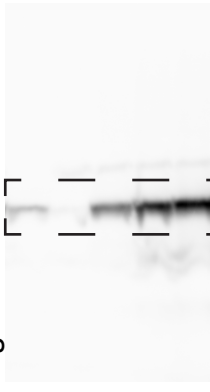

Supplement: EMBJ-36-2488-s005.pdf [file EMBJ-36-2488-s005.pdf]
