# Supplementary material
Source: PubMed Central journal article supplement (PMC5579384)
Supplement: EMBJ-36-2488-s001.pdf [file EMBJ-36-2488-s001.pdf]

## **Appendix: Contents**

Appendix Figures

Appendix Figure Legends

Appendix Supplementary Methods

Appendix References

Appendix Table S1



**A**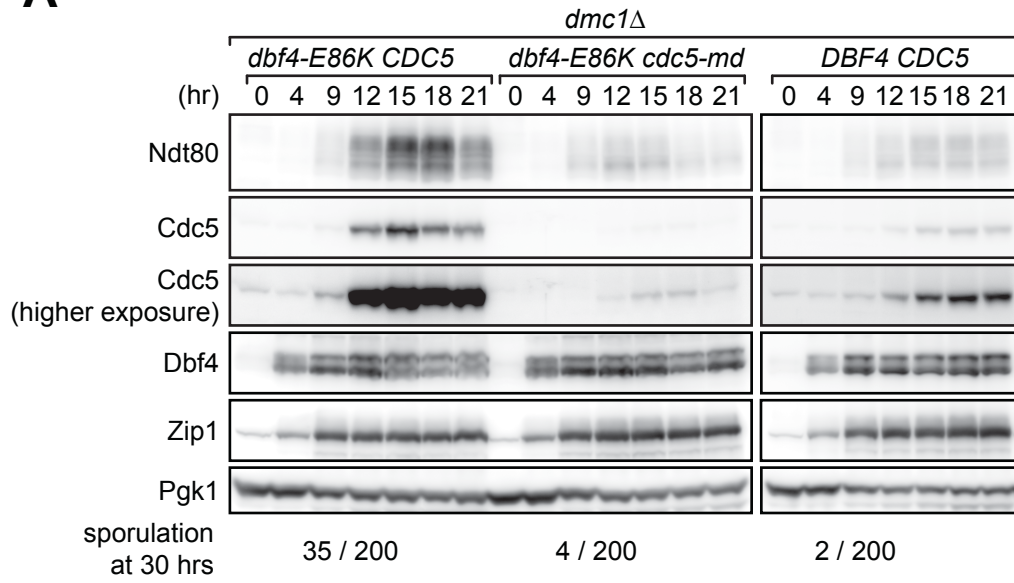**B**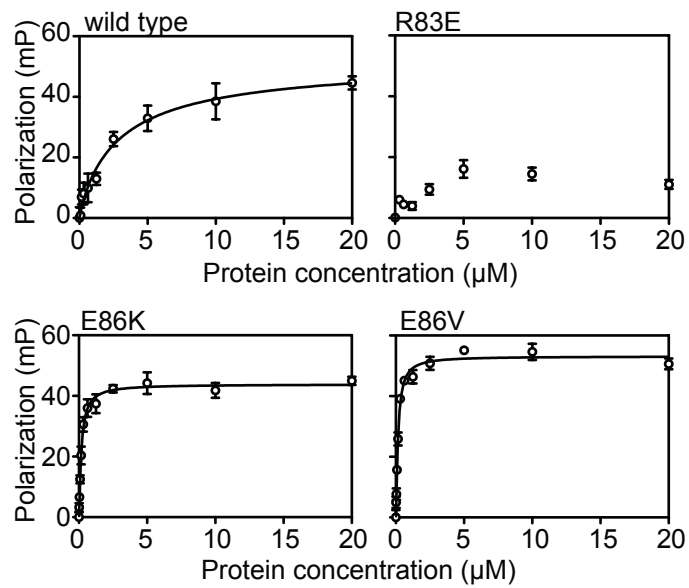

### Appendix figure legends

#### **Figure S1. Enhanced Dbf4-Cdc5 Interaction Suppresses the Cell Cycle Arrest Associated with Defects in Meiotic HR Factors**

(A-C) Strains in the BR1919 background were incubated for 3 days on sporulation plates and sporulation percentage was determined by light microscopy. These mutant backgrounds were employed as they show pachytene arrest as a result of meiotic recombination initiation in the BR1919 background. multi, multicopy vector; single, single copy vector; WT, wild type.

Data are represented as means  $\pm$  SEM from three experiments. At least 100 cells were scored per experiment.

#### **Figure S2. Dbf4-Mediated Suppression of Pachytene Arrest Requires the Dbf4-Cdc5 Interaction**

(A) Strains were induced to synchronously enter meiosis. Cells were harvested at the indicated time points and proteins were detected as in Fig 1B. An overexposed immunoblot of Cdc5 is shown to illustrate the presence of basal levels of Cdc5 before, or in the absence of, pachytene exit.

(B) Plotted data of fluorescence polarization measurements. These data were used to calculate dissociation constants ( $K_d$ ) for the interaction between Dbf4 peptides and Cdc5-PBD (see Fig 1C).

## Supplementary Methods

### Strains and plasmids

The genotypes of all strains used are listed in Appendix Table S1. Strains and plasmids used in each Figure are as follows. Figure 1B: TBR6887, TBR7552, TBR7553, TBR7483. Figure 1C: p1351. Figure 1D: BA081, BA0133, BA0135, BA0137. Figure 2A: TBR6887, TBR7483, TBR8454, TBR8450, TBR9176, TBR9121. Figure 2B: TBR6621, TBR6887, TBR8454, TBR8450, TBR8372, TBR9121. Figure 3A: TBR6887, TBR7483, TBR8672, TBR9175, TBR9237. Figure 3B-3C: TBR10060, TBR10062, TBR10080, TBR10078, TBR10076. Figure 4A: TBR9695, TBR9693, TBR9697, TBR9699, TBR9701. Figures 4B-4C: TBR8673, TBR8674, TBR8764, TBR8765, TBR9107. Figure 4D: TBR9367, TBR9533, TBR9747, TBR9749. Figures 5A-5B: TBR10575. Figure 5C: TBR10060, TBR10062, TBR10080, TBR10190, TBR10192. Figure 5D: TBR10060, TBR10190, TBR10192. Figure 5E: TBR9695, TBR9693. Figure 6A: TBR10582, TBR10656, TBR10603. Figure 6B: TBR10696, TBR10697. Figure 6C: TBR10699. Figure 6D: TBR9693, TBR10798, TBR10840. Figure 6E: TBR10816, TBR10800, TBR10842. Figure 6F: TBR10718, TBR10131, TBR10129. Figure 7A: TBR10843, TBR11031. Figure 7B: TBR10843, TBR10990, TBR10991. Figure EV1A: TBR2065 without vector, along with TBR310, TBR2434, TBR2780, carrying YEplac33 (vector) or p587 (multicopy *DBF4*). Figure EV1B: TBR2065 without vector, TBR310 carrying YCplac22 (vector), p587 (multicopy *DBF4-WT*), p586 (singlecopy *DBF4-WT*), p698 (singlecopy *E86V*). Figure EV1C: TBR2065, TBR310, TBR6448, TBR6449, TBR6450, TBR2434, TBR6451, TBR6505, TBR6506, TBR2780, TBR6507, TBR6508, TBR6557. Figure EV2A: TBR7552, TBR11165, TBR6887. Figure EV3A-3B: TBR310, TBR4711, TBR6448, TBR6449, TBR6450. Figure EV4A: TBR6621, TBR6887, TBR7483, TBR8672. Figure EV4C-4D: TBR11138, TBR11161, TBR11163. Figure EV5A: TBR9697, TBR9701. Figure EV5B: TBR8673, TBR8674, TBR8764, TBR8765, TBR8766. Figure EV5C: TBR6621, TBR9488, TBR7464. Figures EV5D-F: TBR10575. Figure EV6A: TBR10582, TBR10732. Figure EV6B: TBR10603, TBR10733. Figure EV7A:

TBR10101, TBR10105, TBR10119. Figure EV7B: TBR10129. Figure EV7C-D: TBR10843, TBR11143. Figure EV7E: TBR10843, TBR10995. Figure EV7F: TBR10843, TBR11028.

Gene deletions and C-terminus epitope tagging were performed using PCR-mediated gene replacement and tagging techniques as described previously (Longtine et al., 1998). *NDT80-6xHA* was described previously (Tung et al., 2000).

In order to create the *CDC5-DBF4* fusion gene under the control of the *DBF4* promoter, the *DBF4* promoter (536 nucleotides before the start codon), *CDC5*, and *DBF4/dbf4-R83E*, were individually amplified and assembled by PCR, with a sequence encoding five consecutive alanines placed between the two ORFs as a linker. The assembled construct was cloned at the *EcoRI* and *PstI* sites of *YIplac211* (Gietz and Sugino, 1988). The resultant plasmids were linearized by digestion with *NcoI* and integrated at the *URA3* locus.

To identify Ser/Thr residues in *Dbf4* that might be phosphorylated, we focused on residues within or near motif M (Masai and Arai, 2000) that are conserved among *Saccharomyces* species (*cerevisiae*, *bayanus*, *mikatae*, *paradoxus*, *castellii*, *kluuyveri*). These residues were subsequently changed to Ala and the phosphorylation of *Dbf4* was monitored by electrophoretic mobility, leading to identification of the *dbf4-4A* mutant, in which S318, S319, S374 and T375 were changed to Ala.

### **Measuring sporulation**

Single colonies were patched onto YPD or selective plates and incubated at 30°C overnight. These were replica plated onto sporulation medium and incubated at 30°C and sporulation was examined. Incubation was for 48 hours, unless indicated otherwise. For each strain, spore formation was measured in three independent experiments, with at least 100 cells scored in each experiment. Measurements of spore viability came from the dissection of at least 40 tetrads.

### **Protein purification**

A fragment of *CDC5* encoding a part of the protein including the PBD, from amino acid 357 to the C-terminus, was cloned at the BamHI and XhoI sites of pGEX-6P-1 (GE Healthcare Life Sciences) to construct p1351, which was used to produce the GST-CDC5-PBD fusion protein. GST-CDC5-PBD was induced in Rosetta2 (DE3) at 18°C overnight with 0.3 mM of IPTG. The induced cells were sonicated in breaking buffer (50 mM TrisCl (7.5), 10% glycerol, 0.5 mM EDTA, 250 mM NaCl, 0.01% igepal, 1 mM  $\beta$ -MeOH and 100 ug/ml PMSF). The GST-CDC5-PBD fusion in the cleared lysate was bound to glutathione agarose beads (Qiagen), and the bound protein was eluted in the elution buffer (25 mM TrisCl (7.5), 10% glycerol, 0.5 mM EDTA, 250 mM NaCl, 0.01% igepal, 1 mM  $\beta$ -MeOH and 20 mM glutathione). The eluate was fractionated in a gel filtration column with the column buffer (20 mM HEPES pH 7.5, 250 mM NaCl, 5 mM EDTA, 0.5 mM TCEP, 10% glycerol). Peak fractions were combined and concentrated using a microconcentrator (vivaspin-30). The concentrated protein solution was immediately used for measurements.

### **Fluorescence polarization assay**

All peptides used were purchased from Peptide Protein Research (Fareham, UK). Amino acid sequences of the used peptides are as follows:

|           |                                |
|-----------|--------------------------------|
| wild type | Flu-GGEKKRARIERARSIEGAVQVSKGTG |
| R83E      | Flu-GGEKKRARIERAESIEGAVQVSKGTG |
| E86K      | Flu-GGEKKRARIERARSIKGAVQVSKGTG |
| E86V      | Flu-GGEKKRARIERARSIVGAVQVSKGTG |

(Flu, Fluorescein. Two Gs were placed between Flu and the Dbf4 peptide as a linker).

Fluorescein-labelled peptides (WT and mutant Dbf4 peptides) at 100 nM were incubated at room temperature with increasing concentrations of Cdc5-PBD in 20 mM HEPES pH 7.5, 250 mM NaCl, 5 mM EDTA, 0.5 mM TCEP, 10% glycerol and 0.05% tween 20. The sample mixtures, 50  $\mu$ l per sample, were transferred to a black 96-well polypropylene plate for measurement of fluorescence polarization in a POLAR star Omega multimode microplate reader (BMG LABTECH). Emission signals from 50 flashes, with

excitation/emission wavelengths of 485 and 520 nm, respectively, were collected and averaged in endpoint mode for each well with either parallel or perpendicular polarizers in-line. Background fluorescence in samples carrying only peptides was subtracted from all values obtained for the other samples. Polarization data were analysed using GraphPad Prism 5.0 by non-linear fitting with a one-site total binding model. The non-specific binding component was then subtracted from the data for presentation purposes. All data represent the mean of three separate experiments, and error bars represent one standard deviation.

### **Immunoprecipitation (IP)**

100 mL of cells were harvested from sporulating cultures ( $OD_{600} = 1.9$ ) and supplemented with 2 mM PMSF. Cells were washed with ice-cold water containing 2 mM PMSF and cell pellets were frozen in liquid nitrogen and stored at  $-80^{\circ}\text{C}$  until required. Pellets were thawed on ice and resuspended in 300  $\mu\text{L}$  of buffer KA70 (number indicates concentration of KOAc in mM; 50 mM HEPES-KOH pH 7.5, 70 mM KOAc, 5 mM MgOAc, 0.1% NP-40, 10% glycerol, 1 mM DTT, 0.5 mM PMSF, 20 mM  $\beta$ -glycerophosphate, 1 mM NaF and 2x Roche protease inhibitor cocktail). An equal volume of 500 micron glass beads was added and cells were disrupted with a ribolyser (Yasui Kikai). The lysate was stored on ice. Residual lysate was recovered by briefly washing the glass beads with 500  $\mu\text{L}$  of buffer KA70. The combined lysate was centrifuged twice ( $20000\times g$ , 5 mins,  $2^{\circ}\text{C}$ ). Cleared lysate was then split into two equal aliquots. Protein A or Protein G-conjugated magnetic beads, which had been incubated in PBS 0.1% Tween with or without antibody (overnight,  $4^{\circ}\text{C}$ ), were then added to these aliquots and incubated with gentle agitation (3 hrs,  $4^{\circ}\text{C}$ ). Beads were washed with buffer KA70 once and buffer KA100 twice. Proteins were eluted on a thermomixer ( $65^{\circ}\text{C}$ , 1300rpm) with 100  $\mu\text{L}$  of urea loading buffer (8 M urea, 5% SDS, 200 mM Tris-Cl pH 6.8, 1 mM EDTA, 0.01% BPB) freshly supplemented with 0.1 mM DTT and 0.2 M Tris. Proteins were resolved by SDS-PAGE and transferred to PVDF membranes for immunoblot analysis. Protein A beads were used for IP with anti-V5 antibody (mouse, Bio-Rad) and Protein G beads were used for IP with anti-Dbf4 antibody (goat, Santa Cruz yA-16).



## **Cytology**

Meiotic chromosomes were surface spread, and immunostaining was carried out as described previously (Humphryes et al., 2013). Antibodies used are: Rad51, Zip1, and Red1 (rabbit, 300-fold dilution, Shirleen Roeder; Sym et al., 1993; Smith and Roeder, 1997), Rfa1 (rabbit, 300-fold dilution, Bruce Stillman; Zou and Stillman, 2000), tubulin (rat 200-fold dilution, Abcam, ab6161), and HA (mouse, 300-fold dilution, Covance MMS-101R). Images were captured on the Deltavision IX70 system (Applied Precision, Olympus) with a 100x objective lens (NA 1.40) and a camera (CoolSNAP HQ2, Photometrics) using *softWoRx* software at room temperature. Images were deconvolved using the constrained iterative deconvolution algorithm within *softWoRx*, and appropriate consecutive deconvolved z-slices were projected together to form the final processed image.

## **Anchor-away technique**

The Anchor-away technique was performed as described previously (Haruki et al., 2008). Briefly, FRB-tagged strains were constructed in a *tor1-1 fpr1* background to confer resistance to rapamycin and prevent competition between Fpr1 and FKBP12 for FRB binding. Rapamycin (Sigma) was added to cultures at the indicated time points at a final concentration of 1  $\mu\text{g/ml}$ . *DBF4* and *CDC7* were FRB-tagged at their C-termini.

## Appendix references

Gietz RD, Sugino A (1988) New yeast-*Escherichia coli* shuttle vectors constructed with in vitro mutagenized yeast genes lacking six-base pair restriction sites. *Gene* 74, 527-534.

Longtine MS, McKenzie A, Demarini DJ, Shah NG, Wach A, Brachat A, Philippsen P, Pringle JR (1998) Additional modules for versatile and economical PCR-based gene deletion and modification in *Saccharomyces cerevisiae*. *Yeast* 14, 953-961.

Masai H, Arai K (2000) Dbf4 motifs: conserved motifs in activation subunits for Cdc7 kinases essential for S-phase. *Biochem Biophys Res Commun* 275, 228-232.

Sym M, Engebrecht JA, Roeder GS (1993) Zip1 is a synaptonemal complex protein required for meiotic chromosome synapsis. *Cell* 72, 365-378.

Zou L, Stillman B (2000) Assembly of a complex containing Cdc45p, replication protein A, and Mcm2p at replication origins controlled by S-phase cyclin-dependent kinases and Cdc7p-Dbf4p kinase. *Mol Cell Biol* 20, 3086-096.

**Table S1.** Genotypes of yeast strains used in this study.

| Strain  | Genotype <sup>1,2</sup>                                              | Background |
|---------|----------------------------------------------------------------------|------------|
| TBR310  | <i>hop2::ADE2</i>                                                    | BR1919     |
| TBR2065 | wild type                                                            | BR1919     |
| TBR2434 | <i>zip1-4LA</i>                                                      | BR1919     |
| TBR2780 | <i>zip2::kanMX4 zip3::hphMX4</i>                                     | BR1919     |
| TBR4711 | <i>hop2::ADE2 rad17::LEU2</i>                                        | BR1919     |
| TBR6448 | <i>hop2::ADE2 dbf4-E86K</i>                                          | BR1919     |
| TBR6449 | <i>hop2::ADE2 dbf4-R83E</i>                                          | BR1919     |
| TBR6450 | <i>hop2::ADE2 dbf4-E86V</i>                                          | BR1919     |
| TBR6451 | <i>zip1-4LA dbf4-E86K</i>                                            | BR1919     |
| TBR6505 | <i>zip1-4LA dbf4-R83E</i>                                            | BR1919     |
| TBR6506 | <i>zip1-4LA dbf4-E86V</i>                                            | BR1919     |
| TBR6507 | <i>zip2::LEU2 zip3::URA3 dbf4-E86K</i>                               | BR1919     |
| TBR6508 | <i>zip2::LEU2 zip3::URA3 dbf4-R83E</i>                               | BR1919     |
| TBR6557 | <i>zip2::LEU2 zip3::URA3 dbf4-E86V</i>                               | BR1919     |
| TBR6621 | wild type                                                            | SK1        |
| TBR6887 | <i>dmc1::natMX4</i>                                                  | SK1        |
| TBR7464 | <i>dbf4-E86V</i>                                                     | SK1        |
| TBR7483 | <i>dmc1::natMX4 dbf4-E86V</i>                                        | SK1        |
| TBR7552 | <i>dmc1::natMX4 dbf4-E86K</i>                                        | SK1        |
| TBR7553 | <i>dmc1::natMX4 dbf4-R83E</i>                                        | SK1        |
| TBR8372 | <i>dmc1::natMX4 P<sub>DBF4</sub>-CDC5-DBF4-URA3 dbf4-R83E</i>        | SK1        |
| TBR8450 | <i>dmc1::natMX4 P<sub>DBF4</sub>-CDC5-URA3 dbf4-R83E</i>             | SK1        |
| TBR8454 | <i>dmc1::natMX4 P<sub>DBF4</sub>-CDC5-URA3</i>                       | SK1        |
| TBR8672 | <i>dmc1::natMX4 dbf4-E86V dbf4-E86V-URA3</i>                         | SK1        |
| TBR8673 | <i>ndt80::LEU2 ER-GAL-URA3 / ura3-1</i>                              | BR1919     |
| TBR8674 | <i>ndt80::LEU2 ER-GAL-URA3 / P<sub>GAL</sub>-CDC5-URA3</i>           | BR1919     |
| TBR8764 | <i>ndt80::LEU2 ER-GAL-URA3 / P<sub>GAL</sub>-CDC5-URA3 dbf4-E86K</i> | BR1919     |
| TBR8765 | <i>ndt80::LEU2 ER-GAL-URA3 / P<sub>GAL</sub>-CDC5-URA3 dbf4-R83E</i> | BR1919     |
| TBR9107 | <i>ndt80::LEU2 ER-GAL-URA3 / P<sub>GAL</sub>-CDC5-URA3 dbf4-E86V</i> | BR1919     |
| TBR9121 | <i>dmc1::natMX4 P<sub>DBF4</sub>-CDC5-dbf4-R83E-URA3 dbf4-R83E</i>   | SK1        |
| TBR9175 | <i>dmc1::natMX4 rad51::hisGURA3hisG dbf4-E86V</i>                    | SK1        |
| TBR9176 | <i>dmc1::natMX4 P<sub>DBF4</sub>-CDC5-dbf4-R83E-URA3</i>             | SK1        |
| TBR9237 | <i>dmc1::natMX4 rad51::kanMX4 dbf4-E86V dbf4-E86V-URA3</i>           | SK1        |
| TBR9367 | <i>NDT80-6HA</i>                                                     | BR1919     |
| TBR9488 | <i>dbf4-R83E</i>                                                     | SK1        |
| TBR9533 | <i>NDT80-6HA dbf4-R83E</i>                                           | BR1919     |
| TBR9693 | <i>ndt80::LEU2 ER-GAL-URA3 / P<sub>GAL</sub>-CDC5-URA3</i>           | SK1        |
| TBR9695 | <i>ndt80::LEU2 ER-GAL-URA3 / ura3</i>                                | SK1        |
| TBR9697 | <i>ndt80::LEU2 ER-GAL-URA3 / P<sub>GAL</sub>-CDC5-URA3 dbf4-E86K</i> | SK1        |
| TBR9699 | <i>ndt80::LEU2 ER-GAL-URA3 / P<sub>GAL</sub>-CDC5-URA3 dbf4-R83E</i> | SK1        |
| TBR9701 | <i>ndt80::LEU2 ER-GAL-URA3 / P<sub>GAL</sub>-CDC5-URA3 dbf4-E86V</i> | SK1        |
| TBR9747 | <i>NDT80-6HA DBF4 / dbf4::kanMX4 CDC5 / cdc5::natMX4</i>             | BR1919     |
| TBR9749 | <i>NDT80-6HA dbf4-R83E / dbf4::kanMX4 CDC5 /</i>                     | BR1919     |

|          |                                                                                                                            |     |
|----------|----------------------------------------------------------------------------------------------------------------------------|-----|
|          | <i>cdc5::natMX4</i>                                                                                                        |     |
| TBR10060 | <i>ndt80::LEU2 dmc1::natMX4 ER-GAL-URA3 / ura3</i>                                                                         | SK1 |
| TBR10062 | <i>ndt80::LEU2 dmc1::natMX4 ER-GAL-URA3 / P<sub>GAL</sub>-CDC5-URA3</i>                                                    | SK1 |
| TBR10076 | <i>ndt80::LEU2 dmc1::natMX4 ER-GAL-URA3 / P<sub>GAL</sub>-CDC5-URA3 dbf4-E86V</i>                                          | SK1 |
| TBR10078 | <i>ndt80::LEU2 dmc1::natMX4 ER-GAL-URA3 / P<sub>GAL</sub>-CDC5-URA3 dbf4-R83E</i>                                          | SK1 |
| TBR10080 | <i>ndt80::LEU2 dmc1::natMX4 ER-GAL-URA3 / P<sub>GAL</sub>-CDC5-URA3 dbf4-E86K</i>                                          | SK1 |
| TBR10101 | <i>MAT<math>\alpha</math> tor1-1::HIS3 fpr1::hphMX4 RPL13A-2xFKBP12::TRP1 dmc1::natMX4 CDC7-FRB</i>                        | SK1 |
| TBR10105 | <i>MAT<math>\alpha</math> tor1-1::HIS3 fpr1::hphMX4 RPL13A-2xFKBP12::TRP1 dmc1::natMX4 DBF4-FRB</i>                        | SK1 |
| TBR10119 | <i>MAT<math>\alpha</math> tor1-1::HIS3 fpr1::hphMX4 RPL13A-2xFKBP12::TRP1 dmc1::natMX4</i>                                 | SK1 |
| TBR10129 | <i>ndt80::LEU2 tor1-1::HIS3 fpr1::hphMX4 RPL13A-2xFKBP12::TRP1 ER-GAL-URA3 / P<sub>GAL</sub>-CDC5-URA3 DBF4-FRB-kanMX4</i> | SK1 |
| TBR10131 | <i>ndt80::LEU2 tor1-1::HIS3 fpr1::hphMX4 RPL13A-2xFKBP12::TRP1 ER-GAL-URA3 / P<sub>GAL</sub>-CDC5-URA3 CDC7-FRB-kanMX4</i> | SK1 |
| TBR10190 | <i>ndt80::LEU2 dmc1::natMX4 ER-GAL-URA3 / P<sub>GAL</sub>-cdc5-N209A-URA3</i>                                              | SK1 |
| TBR10192 | <i>ndt80::LEU2 dmc1::natMX4 ER-GAL-URA3 / P<sub>GAL</sub>-cdc5-N209A-URA3 dbf4-E86K</i>                                    | SK1 |
| TBR10575 | <i>ndt80::LEU2 rad51::hisGURA3hisG dmc1::natMX4 ER-GAL-URA3 / P<sub>GAL</sub>-CDC5-URA3</i>                                | SK1 |
| TBR10582 | <i>cdc28-as1 P<sub>CLB2</sub>-cdc20</i>                                                                                    | SK1 |
| TBR10603 | <i>cdc28-as1 P<sub>CLB2</sub>-cdc20 P<sub>CLB2</sub>-cdc5</i>                                                              | SK1 |
| TBR10656 | <i>cdc28-as1 P<sub>CLB2</sub>-cdc20 dbf4-R83E</i>                                                                          | SK1 |
| TBR10696 | <i>cdc28-as1 ndt80::LEU2</i>                                                                                               | SK1 |
| TBR10697 | <i>cdc28-as1 ndt80::LEU2 P<sub>CLB2</sub>-cdc5</i>                                                                         | SK1 |
| TBR10699 | <i>cdc28-as1 ndt80::LEU2 P<sub>CLB2</sub>-cdc5 ER-GAL-URA3 / P<sub>GAL</sub>-CDC5-URA3</i>                                 | SK1 |
| TBR10718 | <i>ndt80::LEU2 tor1-1::HIS3 fpr1::hphMX4 RPL13A-2xFKBP12::TRP1 ER-GAL-URA3 / P<sub>GAL</sub>-CDC5-URA3</i>                 | SK1 |
| TBR10732 | <i>cdc28-as1</i>                                                                                                           | SK1 |
| TBR10733 | <i>cdc28-as1 P<sub>CLB2</sub>-cdc5</i>                                                                                     | SK1 |
| TBR10798 | <i>ndt80::LEU2 ER-GAL-URA3 / P<sub>GAL</sub>-CDC5-URA3 P<sub>CLB2</sub>-dbf4</i>                                           | SK1 |
| TBR10800 | <i>ER-GAL-URA3 / P<sub>GAL</sub>-CDC5-URA3 P<sub>CLB2</sub>-dbf4</i>                                                       |     |
| TBR10816 | <i>ER-GAL-URA3 / P<sub>GAL</sub>-CDC5-URA3</i>                                                                             | SK1 |
| TBR10840 | <i>ndt80::LEU2 ER-GAL-URA3 / P<sub>GAL</sub>-CDC5-URA3 P<sub>CLB2</sub>-dbf4 MCM5-bob1</i>                                 | SK1 |
| TBR10842 | <i>ER-GAL-URA3 / P<sub>GAL</sub>-CDC5-URA3 P<sub>CLB2</sub>-dbf4 MCM5-bob1</i>                                             | SK1 |
| TBR10843 | <i>ndt80::LEU2 ER-GAL-URA3-DBF4-TRP1 / P<sub>GAL</sub>-CDC5-</i>                                                           | SK1 |

|          |                                                                                                                                                     |     |
|----------|-----------------------------------------------------------------------------------------------------------------------------------------------------|-----|
|          | <i>URA3-DBF4-TRP1 P<sub>CLB2</sub>-dbf4</i>                                                                                                         |     |
| TBR10990 | <i>ndt80::LEU2 ER-GAL-URA3-dbf4<sup>S374A,T375A</sup>-TRP1 / P<sub>GAL</sub>-CDC5-URA3- dbf4<sup>S374A,T375A</sup> -TRP1 P<sub>CLB2</sub>-dbf4</i>  | SK1 |
| TBR10991 | <i>ndt80::LEU2 ER-GAL-URA3- dbf4<sup>S374A</sup>-TRP1 / P<sub>GAL</sub>-CDC5-URA3- dbf4<sup>S374A</sup>-TRP1 P<sub>CLB2</sub>-dbf4</i>              | SK1 |
| TBR10995 | <i>ndt80::LEU2 ER-GAL-URA3- dbf4<sup>T375A</sup>-TRP1 / P<sub>GAL</sub>-CDC5-URA3- dbf4<sup>T375A</sup>-TRP1 P<sub>CLB2</sub>-dbf4</i>              | SK1 |
| TBR11028 | <i>ndt80::LEU2 ER-GAL-URA3- dbf4<sup>S318A,S319A</sup>-TRP1 / P<sub>GAL</sub>-CDC5-URA3- dbf4<sup>S318A,S319A</sup> -TRP1 P<sub>CLB2</sub>-dbf4</i> | SK1 |
| TBR11031 | <i>ndt80::LEU2 ER-GAL-URA3- dbf4-4A-TRP1/ P<sub>GAL</sub>-CDC5-URA3- dbf4-4A-TRP1 P<sub>CLB2</sub>-dbf4</i>                                         | SK1 |
| TBR11138 | <i>HIS4::LEU2-(NBam_mom) / HIS4:LEU2-(NBam_dad)</i>                                                                                                 | SK1 |
| TBR11143 | <i>ndt80::LEU2 ER-GAL-URA3- dbf4-4A-TRP1/ P<sub>GAL</sub>-CDC5-URA3- dbf4-4A-TRP1 P<sub>CLB2</sub>-dbf4 P<sub>DMC1</sub>-dbf4-4A-HIS6/HIS6</i>      | SK1 |
| TBR11161 | <i>dmc1::natMX4 dbf4-E86V HIS4::LEU2-(NBam_mom) / HIS4:LEU2-(NBam_dad)</i>                                                                          | SK1 |
| TBR11163 | <i>dmc1::natMX4 dbf4-E86V URA3-dbf4-E86V HIS4::LEU2-(NBam_mom) / HIS4:LEU2-(NBam_dad)</i>                                                           | SK1 |
| TBR11165 | <i>dmc1::natMX4 dbf4-E86K P<sub>CLB2</sub>-cdc5</i>                                                                                                 | SK1 |
| TBR11165 | <i>dmc1::natMX4 dbf4-E86K P<sub>CLB2</sub>-cdc5</i>                                                                                                 | SK1 |
| TBR11165 | <i>dmc1::natMX4 dbf4-E86K P<sub>CLB2</sub>-cdc5</i>                                                                                                 | SK1 |
| TBR11165 | <i>dmc1::natMX4 dbf4-E86K P<sub>CLB2</sub>-cdc5</i>                                                                                                 | SK1 |
| BA081    | <i>P<sub>CLB2</sub>-cdc20 CDC7-9xV5</i>                                                                                                             | SK1 |
| BA0133   | <i>P<sub>CLB2</sub>-cdc20 CDC7-9xV5 dbf4-E86K</i>                                                                                                   | SK1 |
| BA0135   | <i>P<sub>CLB2</sub>-cdc20 CDC7-9xV5 dbf4-R83E</i>                                                                                                   | SK1 |
| BA0137   | <i>P<sub>CLB2</sub>-cdc20 CDC7-9xV5 dbf4-E86V</i>                                                                                                   | SK1 |

<sup>1</sup>BR1919 strains are in the following genetic background:  
*ho leu2-3, 112 his4-260 ura3-1 ade2-1 thr1-4 trp1-289 lys2*

<sup>2</sup>SK1 strains are in the following genetic background:  
*ho::LYS2 lys2 ura3 leu2::hisG his3::hisG trp1::hisG*

All listed strains are isogenic diploids, unless indicated otherwise, derived from either BR1919 or SK1. All loci are homozygous, unless indicated otherwise by a forward slash symbol (/), in which case heterozygosity is described. Strains carrying point mutations in *DBF4* at R83 or E86 also contain a silent G to C transversion at nucleotide 285 of the open-reading frame, resulting in the generation of a KpnI site. This restriction site was used for genotyping purposes. *P<sub>CLB2</sub>* denotes that a gene was placed under the control of the *CLB2* promoter. *CLB2* is not expressed in meiotic cells. This is the equivalent of a meiotic depletion mutant (*-md*; Lee and Amon, 2003).
