# Supplementary material
Source: PubMed Central journal article supplement (PMC5579384)

anti-Cdc5

Fig 2A. dmc1 DBF4 -

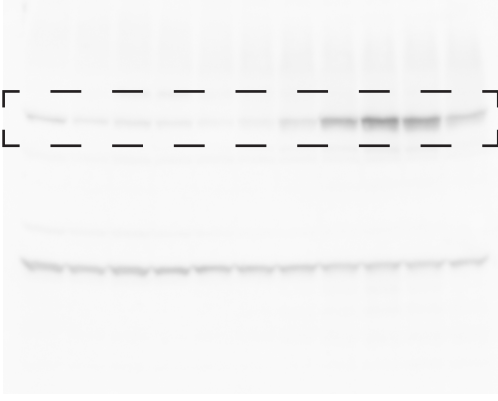

Fig 2A. dmc1 E86V -

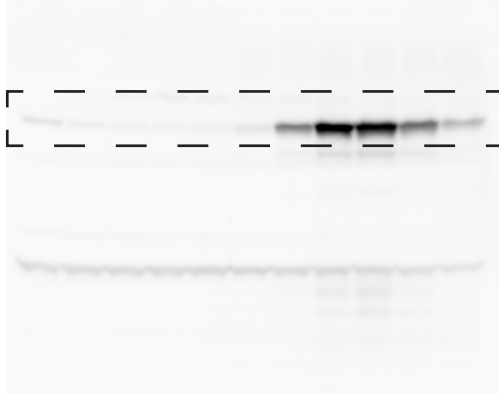

Fig 2A. dmc1 DBF4 CDC5

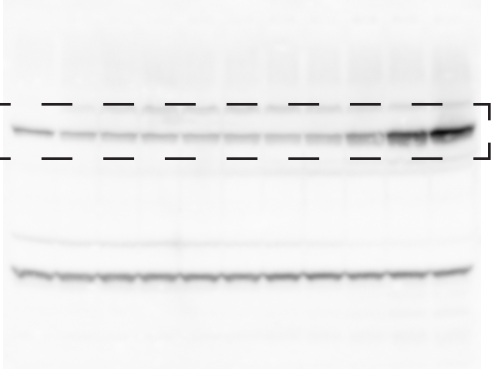

Fig 2A. dmc1 R83E CDC5

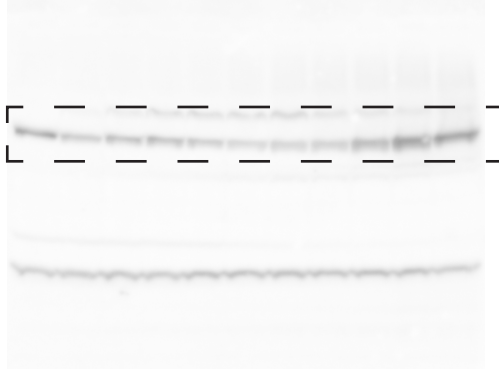

Fig 2A. dmc1 R83E C5-D4

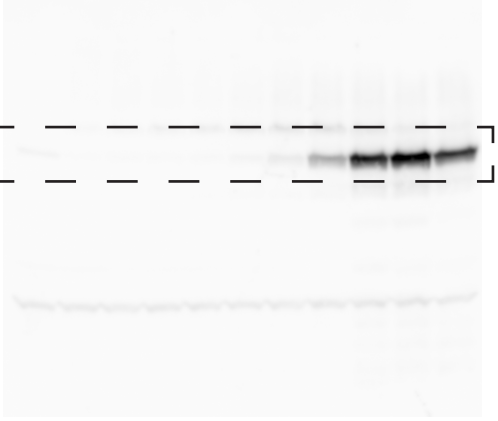

Fig 2A. dmc1 R83E C5-R83E

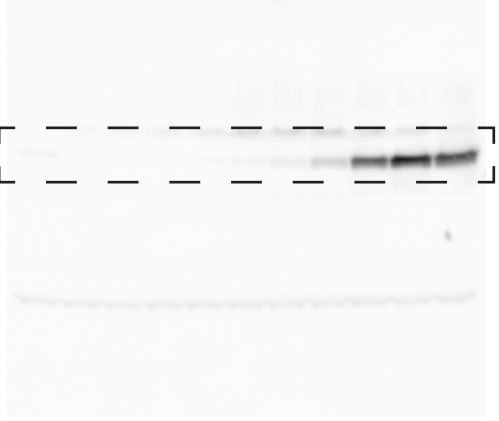

anti-Ndt80

Fig 2A. dmc1 R83E C5-D4

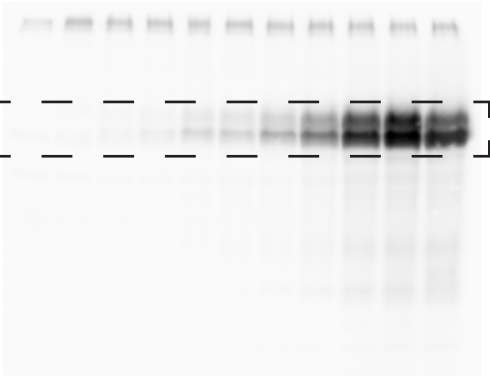

Fig 2A. dmc1 DBF4 CDC5

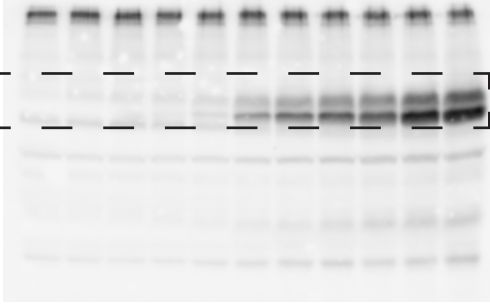

Fig 2A. dmc1 DBF4 -

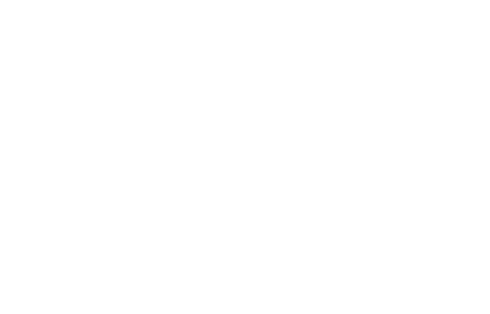

Fig 2A. dmc1 R83E C5-R83E

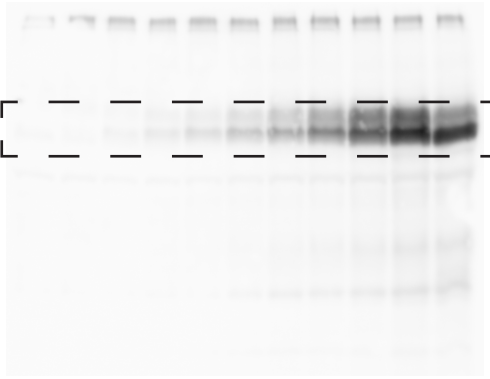

Fig 2A. dmc1 R83E CDC5

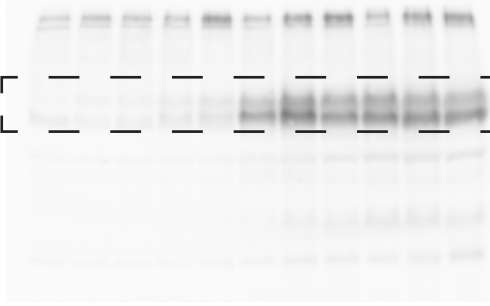

Fig 2A. dmc1 E86V -

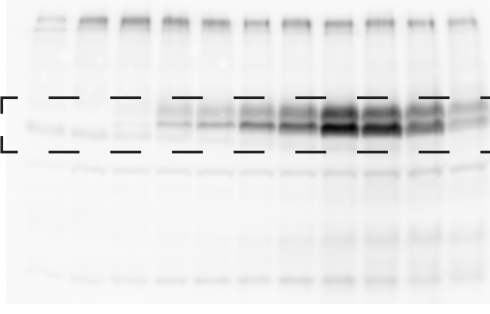

anti-Pgk1

Fig 2A. dmc1 R83E C5-D4 Fig 2A. dmc1 DBF4 CDC5 Fig 2A. dmc1 DBF4 -

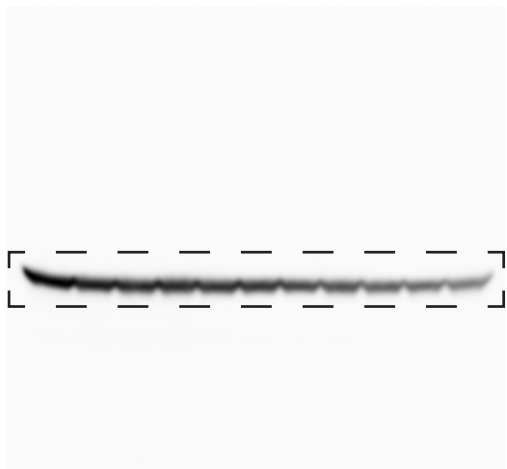

Fig 2A. dmc1 R83E CDC5

Fig 2A. dmc1 R83E C5-R83E Fig 2A. dmc1 R83E CDC5 Fig 2A. dmc1 E86V -

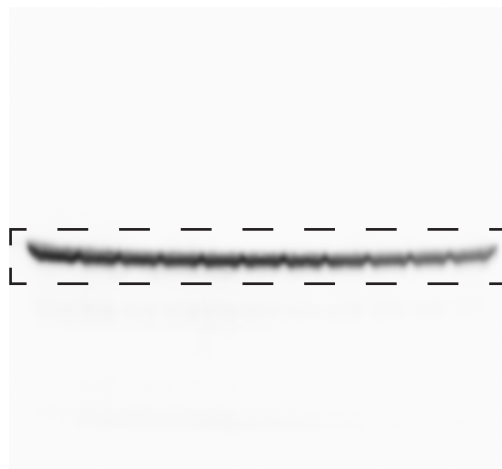

Supplement: EMBJ-36-2488-s004.pdf [file EMBJ-36-2488-s004.pdf]
