# Supplementary material
Source: PubMed Central journal article supplement (PMC5579384)
Supplement: EMBJ-36-2488-s006.pdf [file EMBJ-36-2488-s006.pdf]

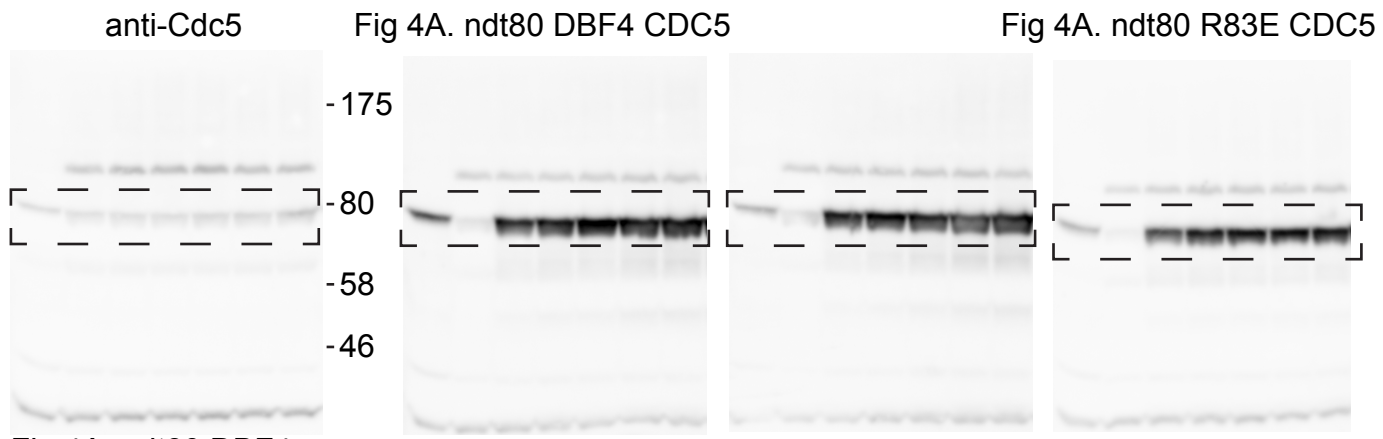

Fig 4A. ndt80 DBF4 -

Fig 4A. ndt80 E86K CDC5

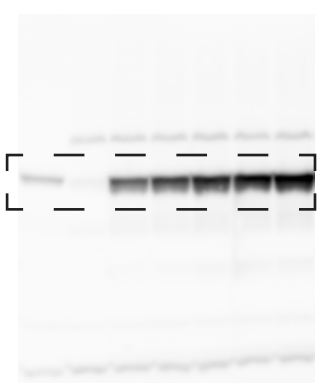

Fig 4A. ndt80 E86V CDC5

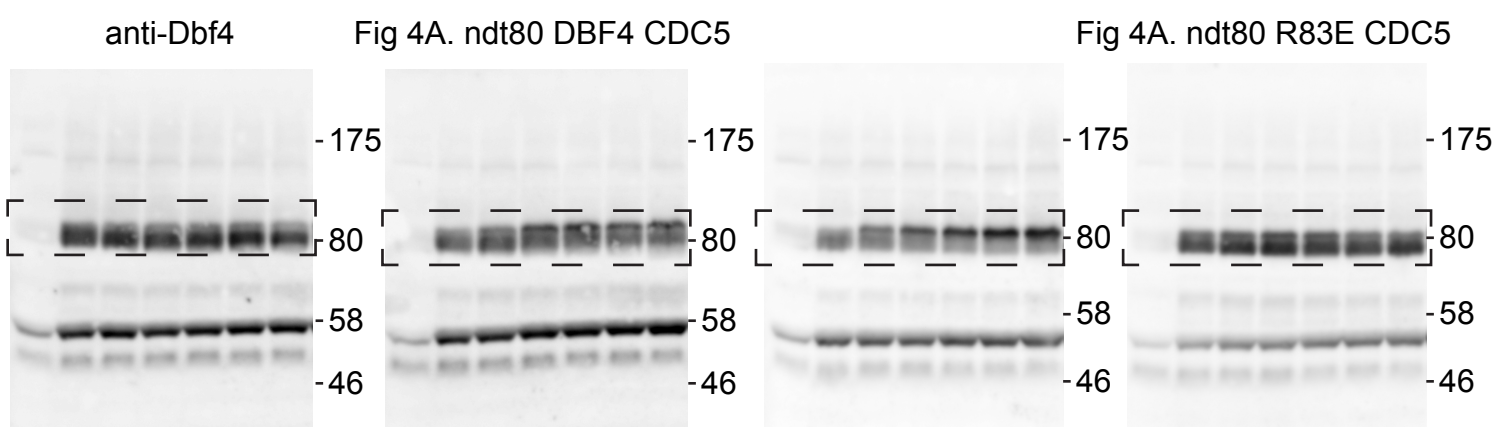

Fig 4A. ndt80 DBF4 -

Fig 4A. ndt80 E86K CDC5

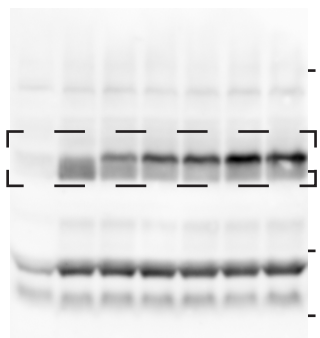

Fig 4A. ndt80 E86V CDC5

anti-Red1

Fig 4A. ndt80 DBF4 CDC5

Fig 4A. ndt80 R83E CDC5

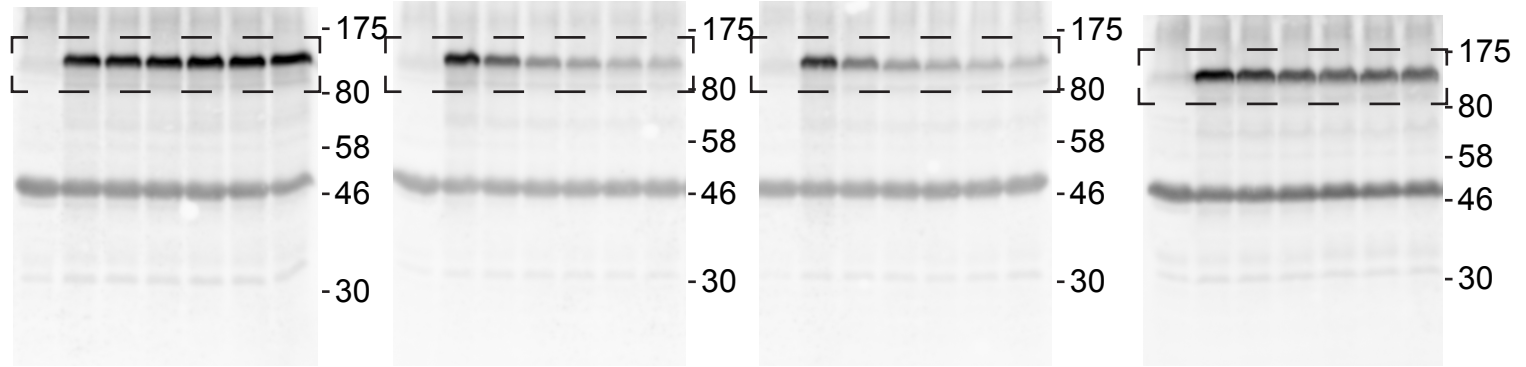

Fig 4A. ndt80 DBF4 -

Fig 4A. ndt80 E86K CDC5

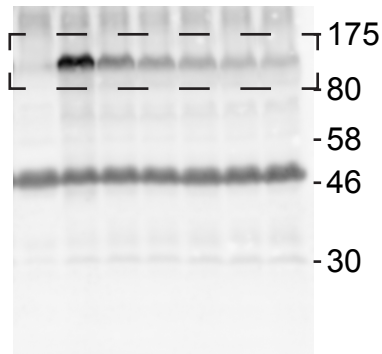

Fig 4A. ndt80 E86V CDC5

anti-Pgk1

Fig 4A. ndt80 DBF4 CDC5

Fig 4A. ndt80 R83E CDC5

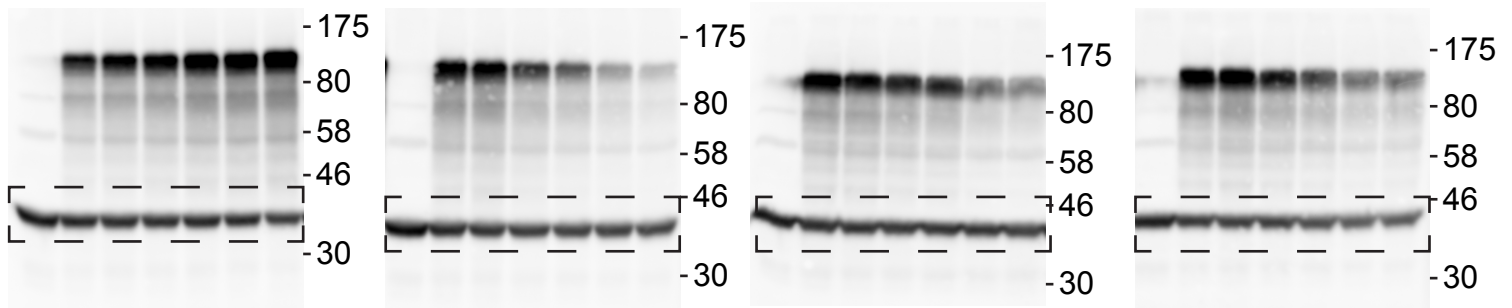

Fig 4A. ndt80 DBF4 -

Fig 4A. ndt80 E86K CDC5

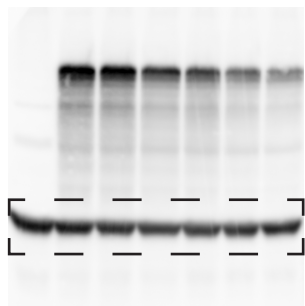

Fig 4A. ndt80 E86V CDC5
