# Supplementary material
Source: PubMed Central journal article supplement (PMC5579384)
Supplement: EMBJ-36-2488-s008.pdf [file EMBJ-36-2488-s008.pdf]

A

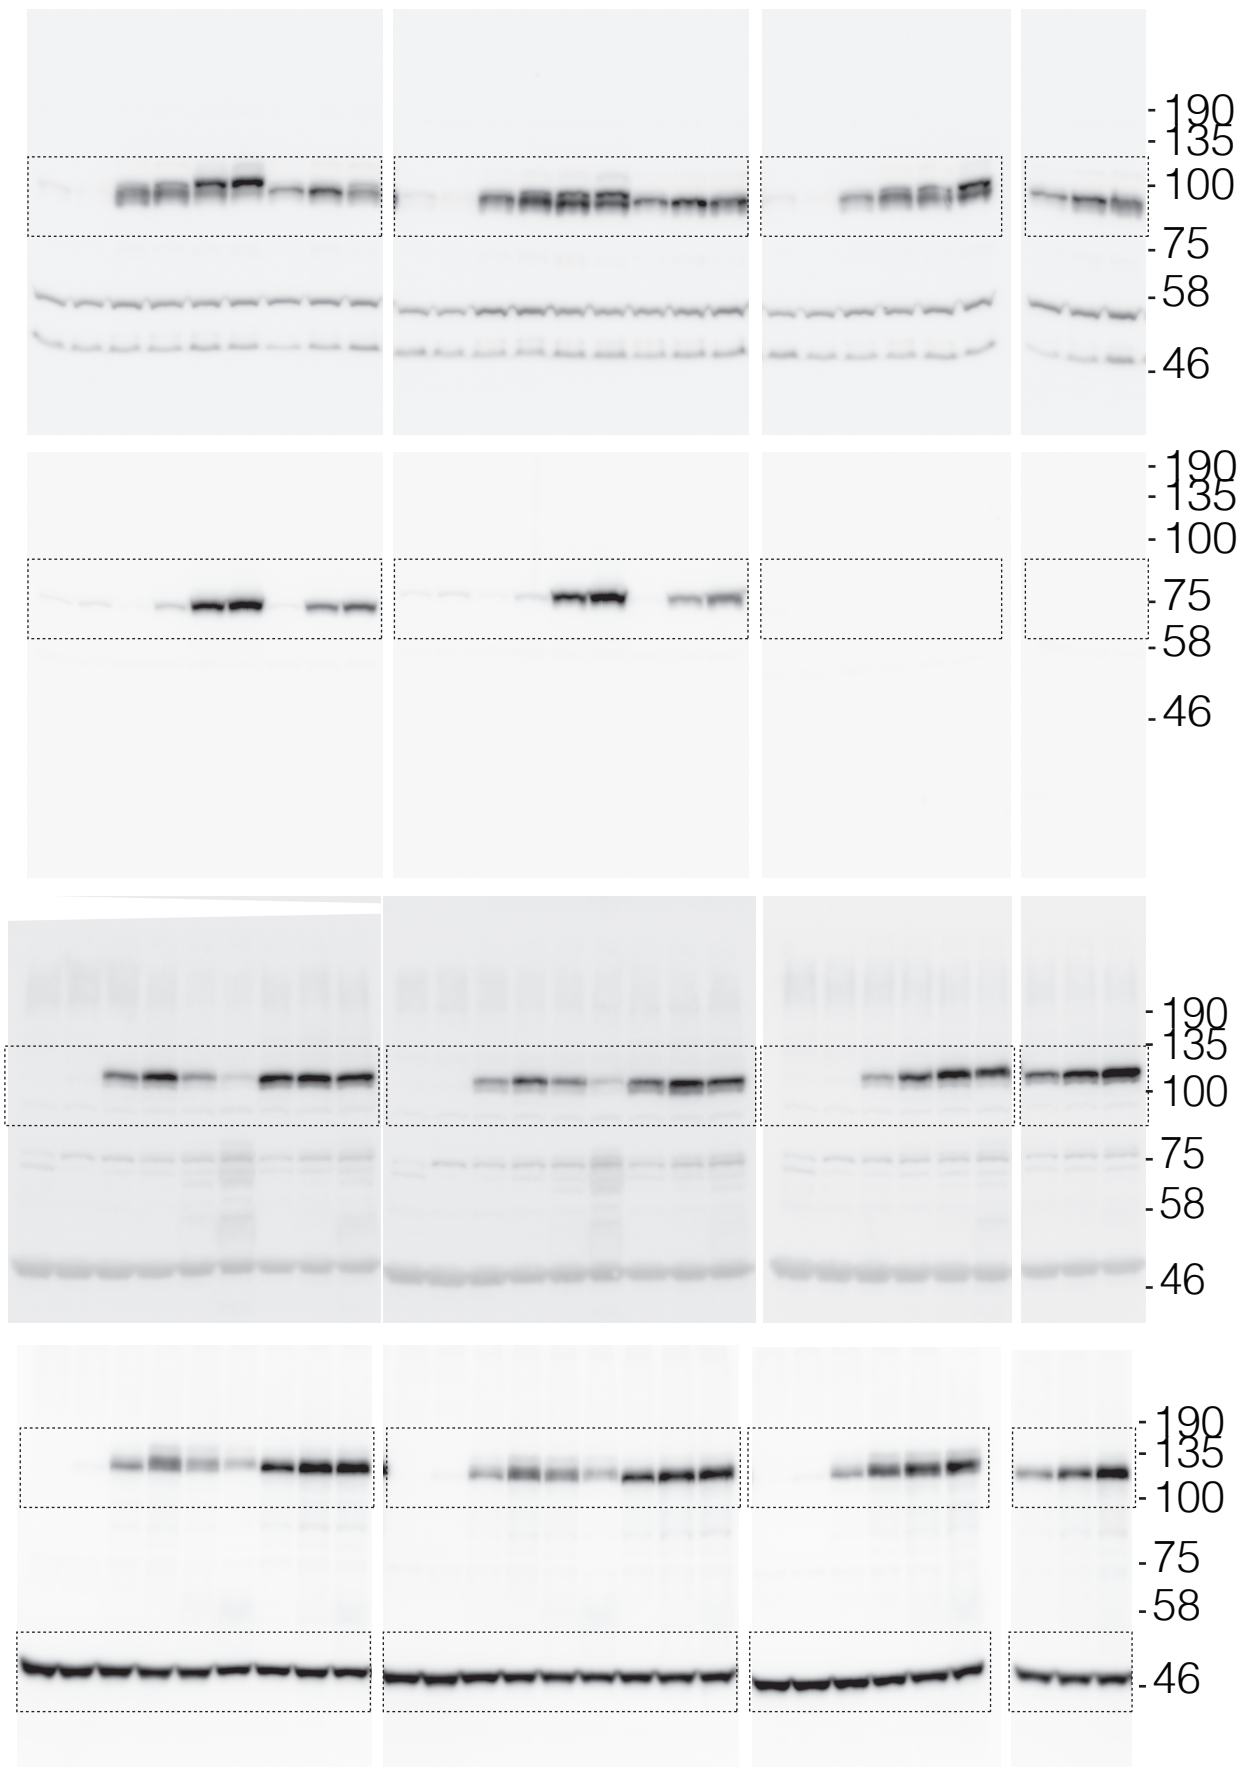

B

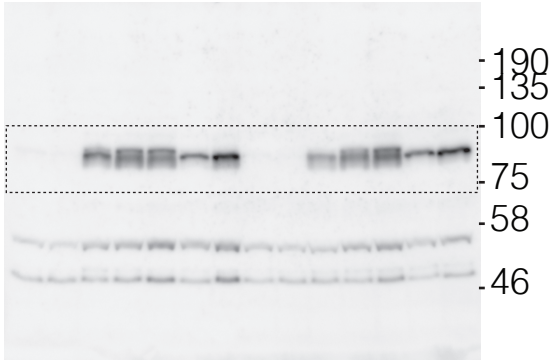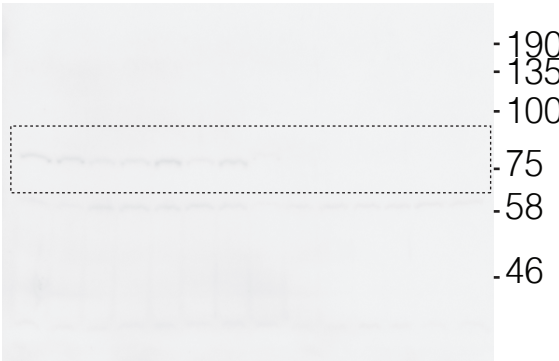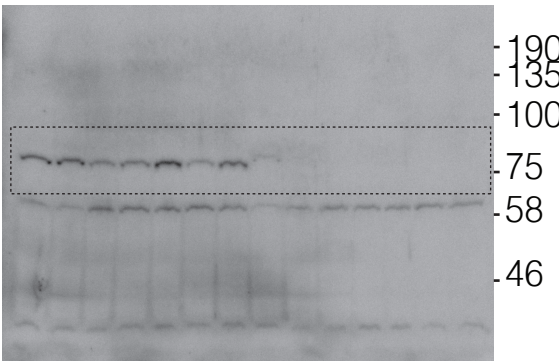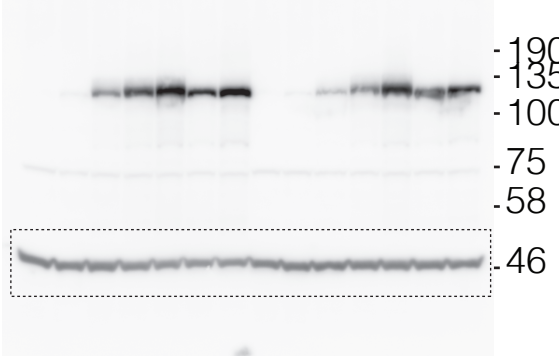

C

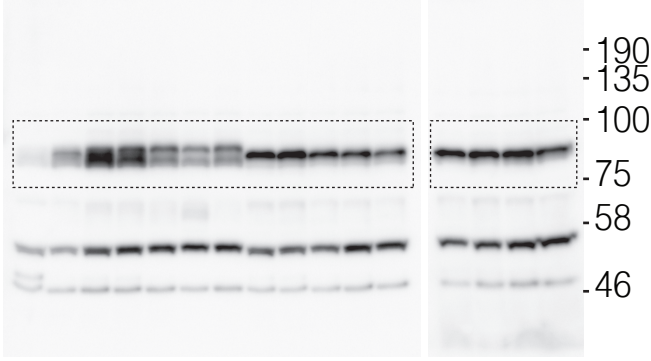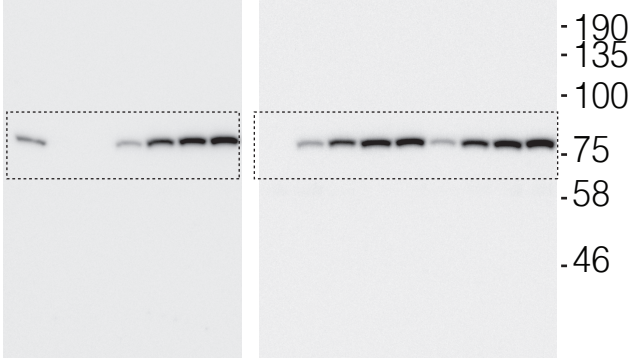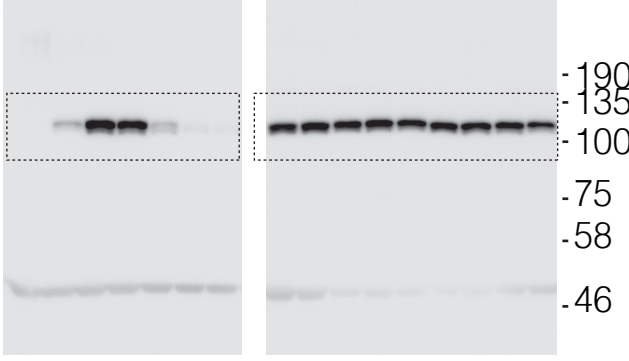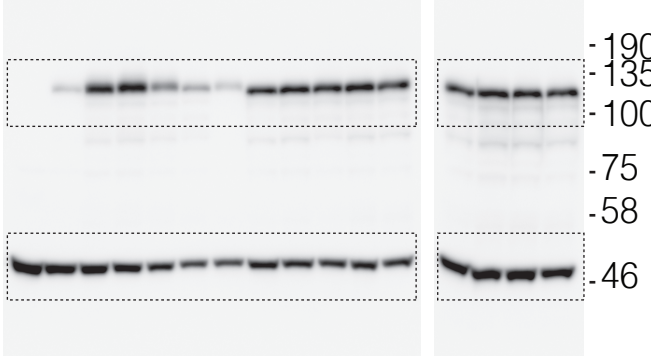



Fig. 6D. ndt80 DBF4, dbf4-md

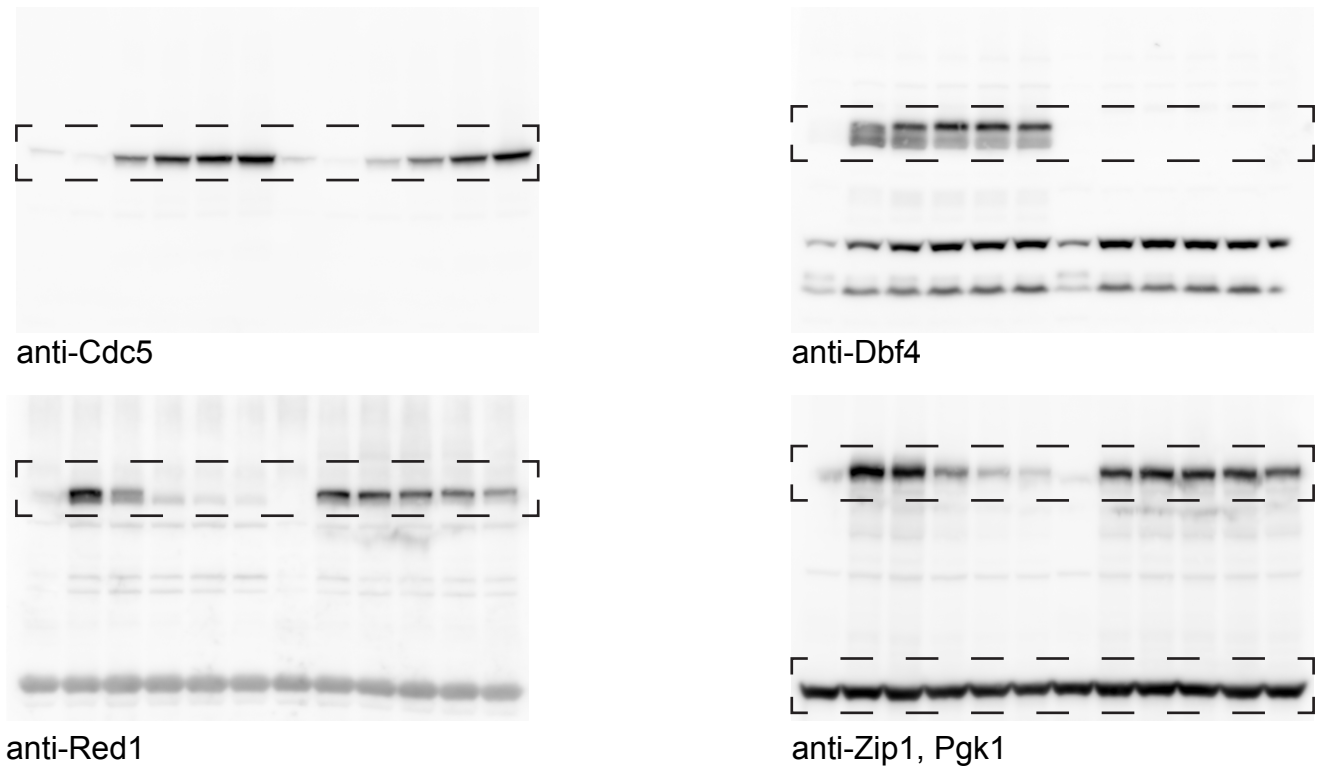

Fig. 6D. ndt80 dbf4-md bob1

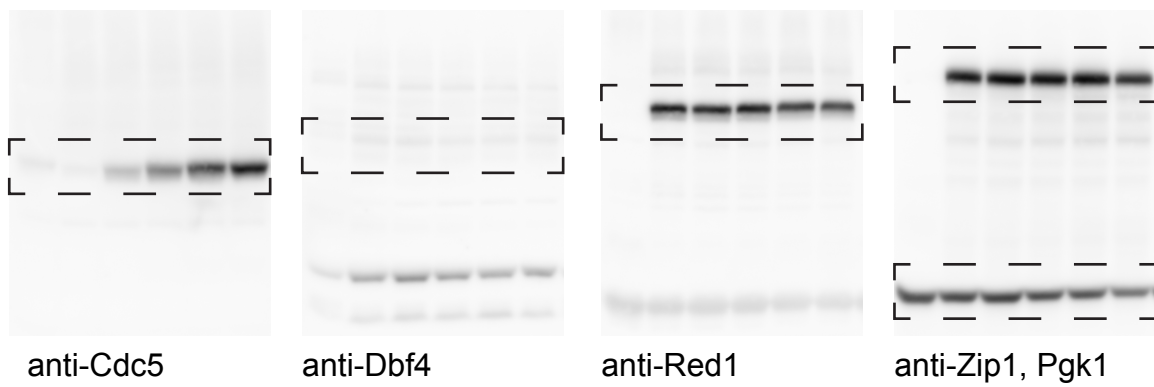

Fig. 6E. DBF4, dbf4-md

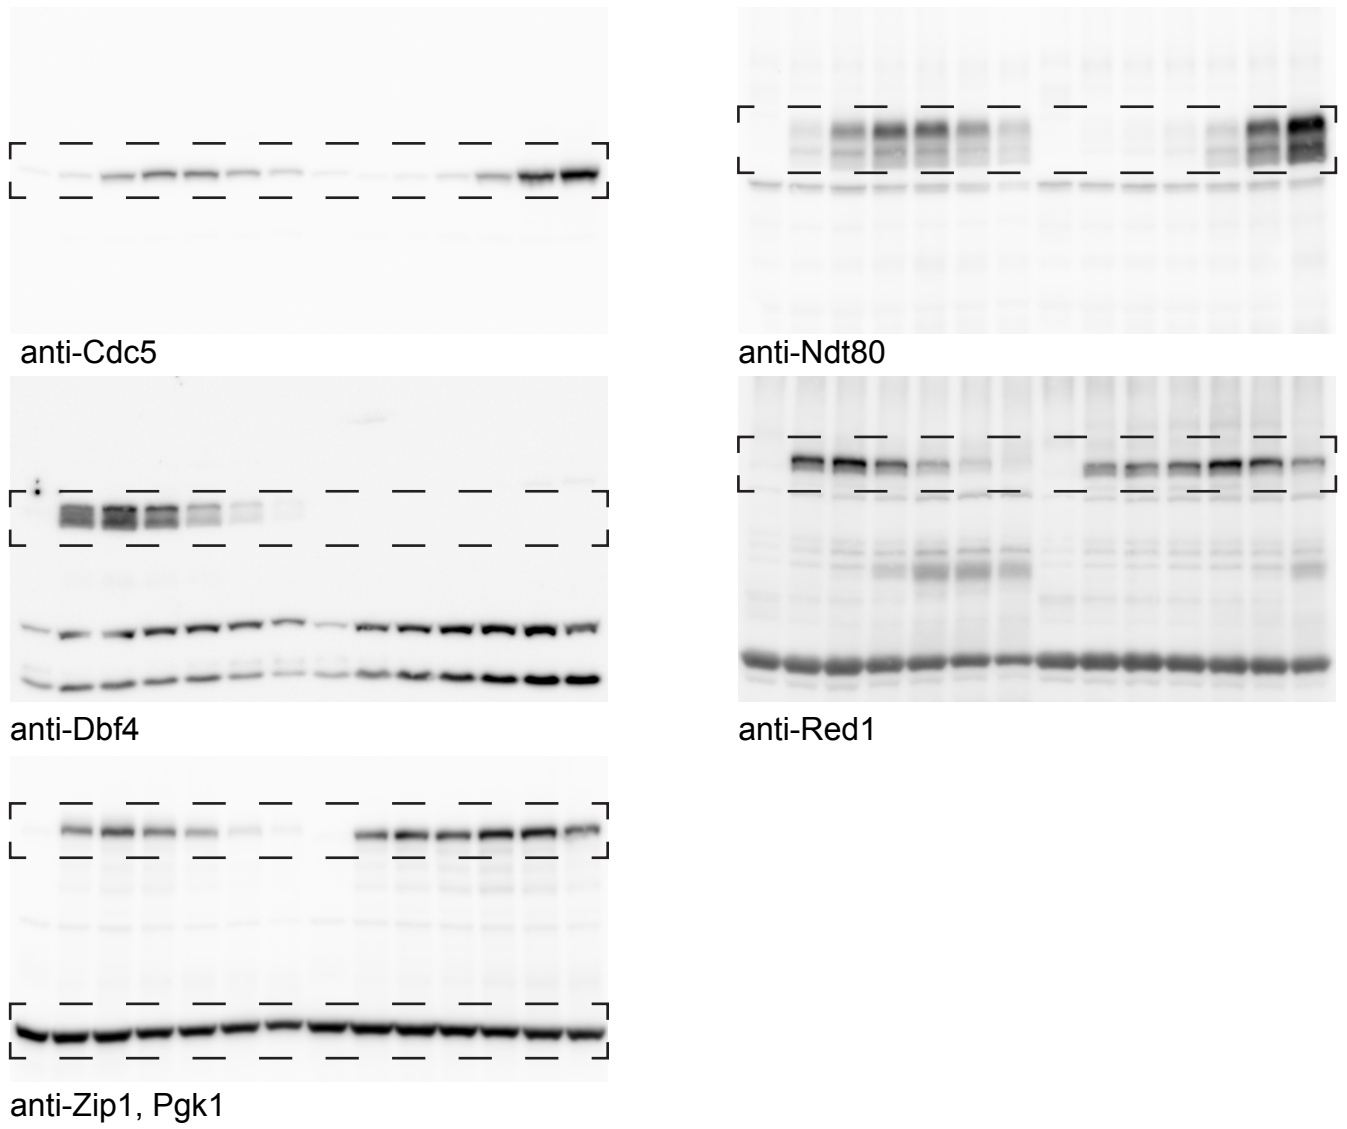

Fig. 6E. dbf4-md bob1

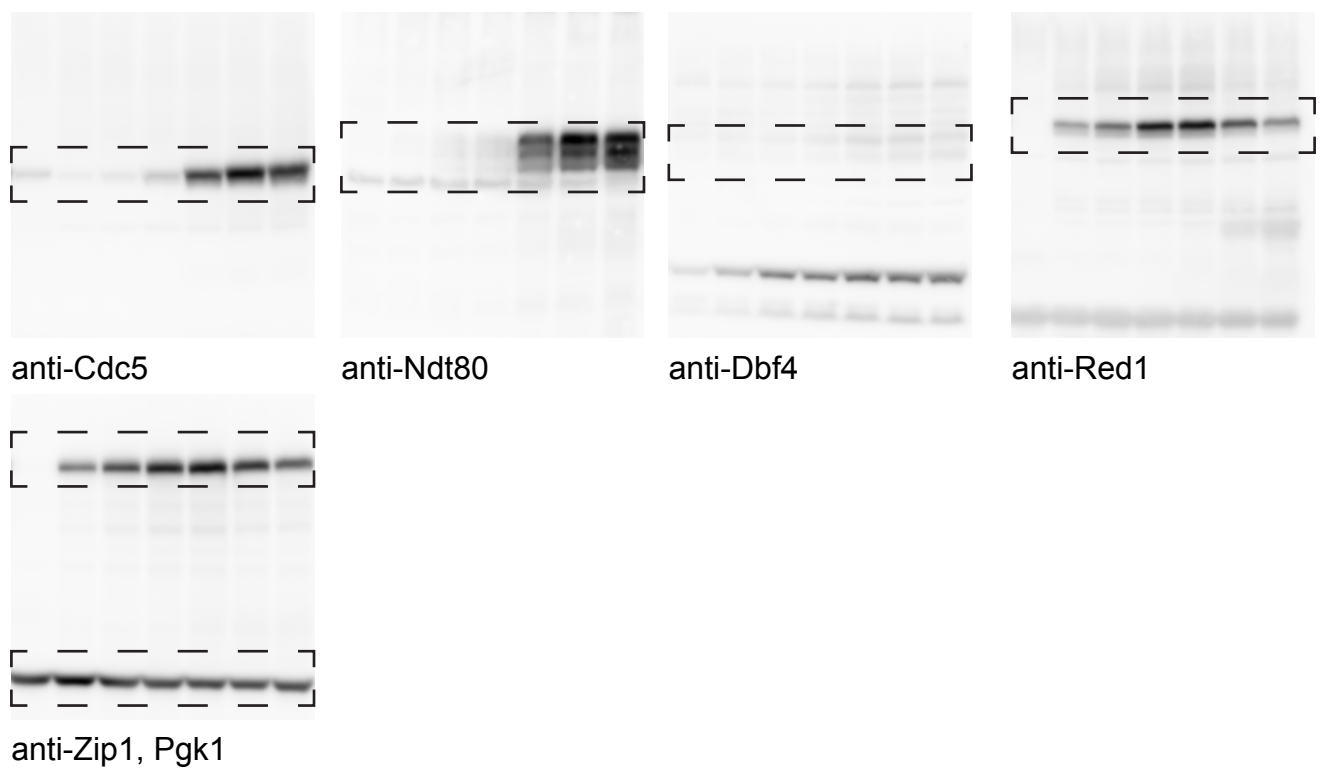

Fig. 6F. DBF4 CDC7

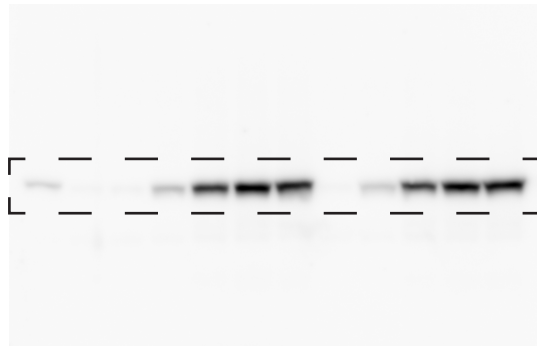

anti-Cdc5

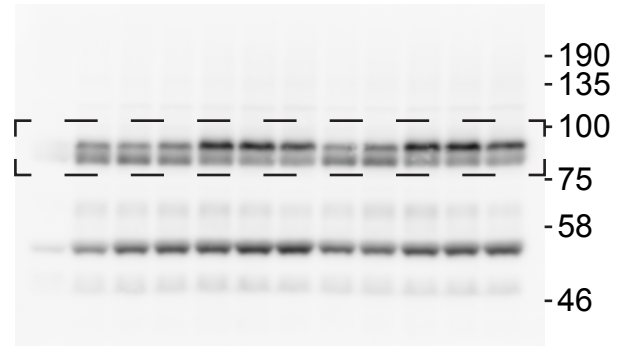

anti-Dbf4

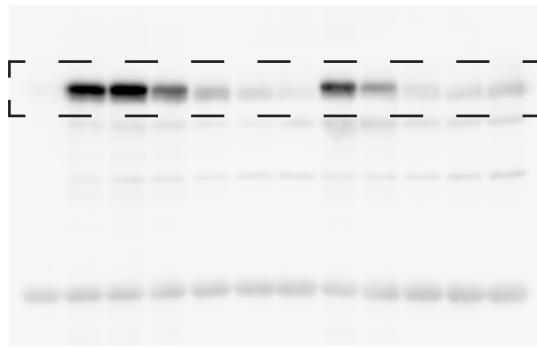

anti-Red1

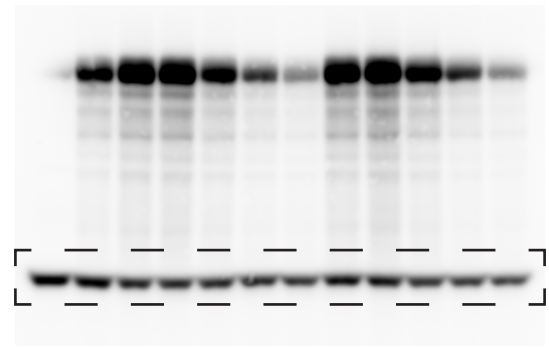

anti-Pgk1

Fig. 6F. cdc7-FRB

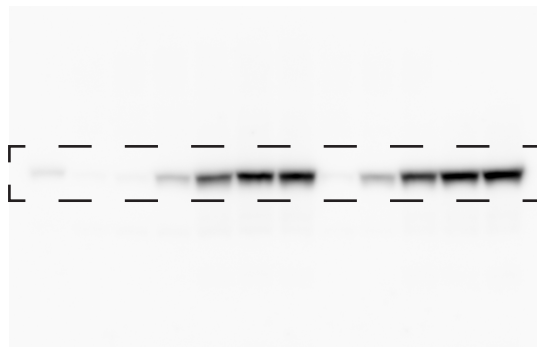

anti-Cdc5

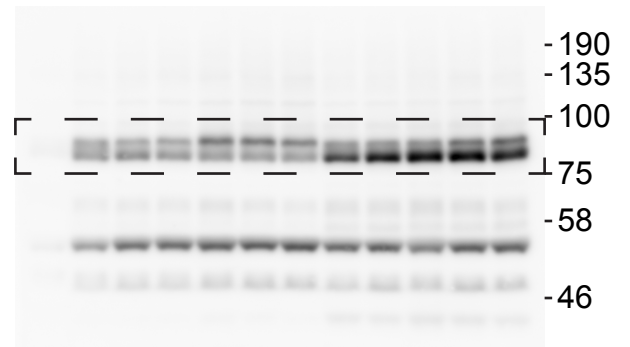

anti-Dbf4

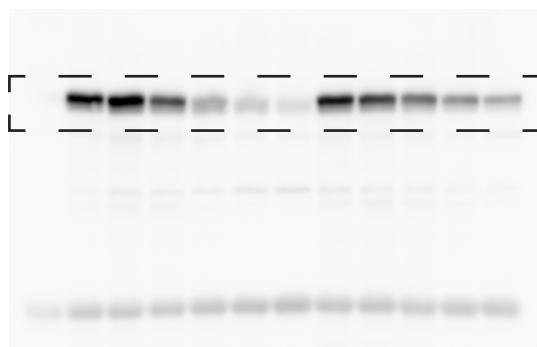

anti-Red1

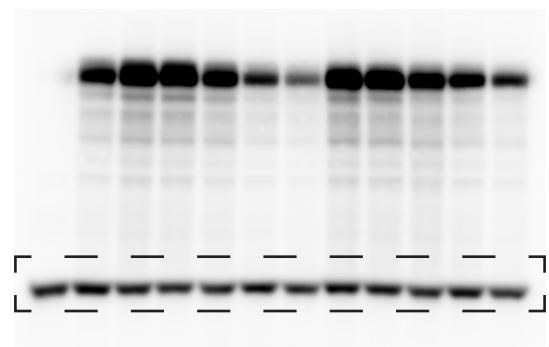

anti-Pgk1



Fig. 6F. dbf4-FRB

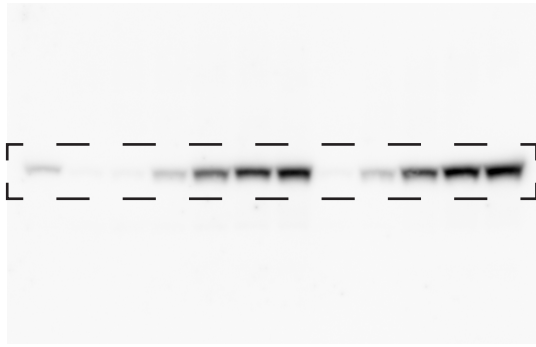

anti-Cdc5

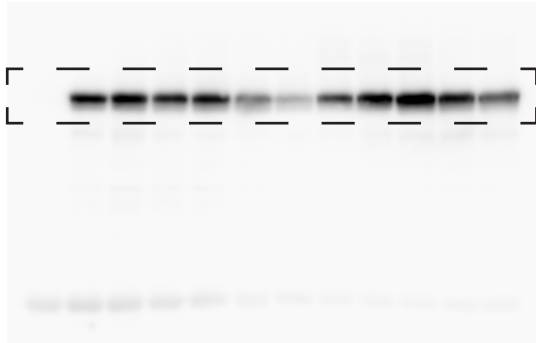

anti-Red1

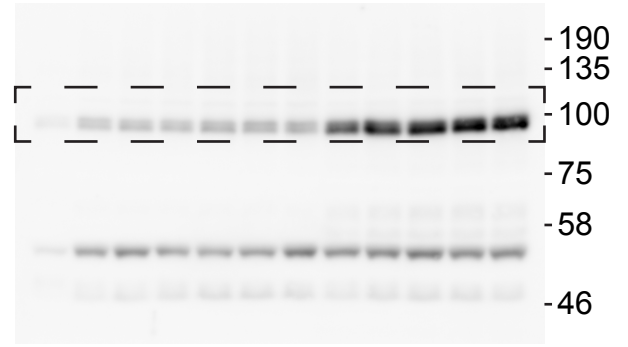

anti-Dbf4

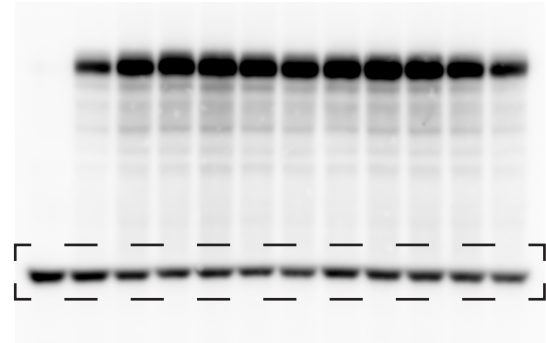

anti-Pgk1
