# Supplementary material
Source: PubMed Central journal article supplement (PMC5579384)
Supplement: EMBJ-36-2488-s009.pdf [file EMBJ-36-2488-s009.pdf]

Fig. 7A. DBF4, dbf4-4A

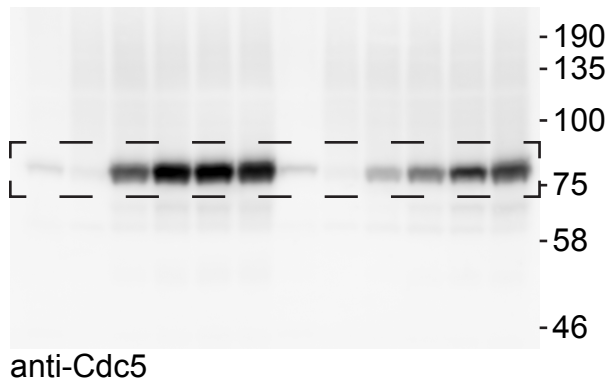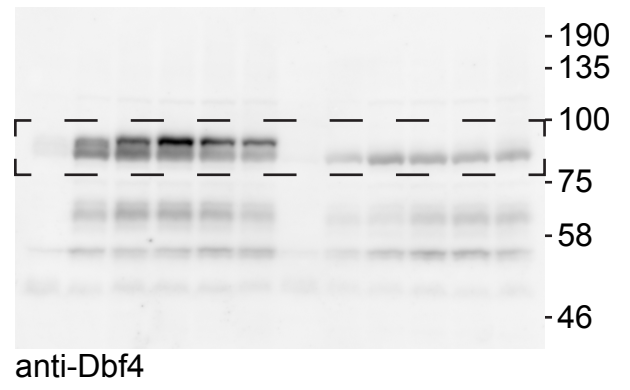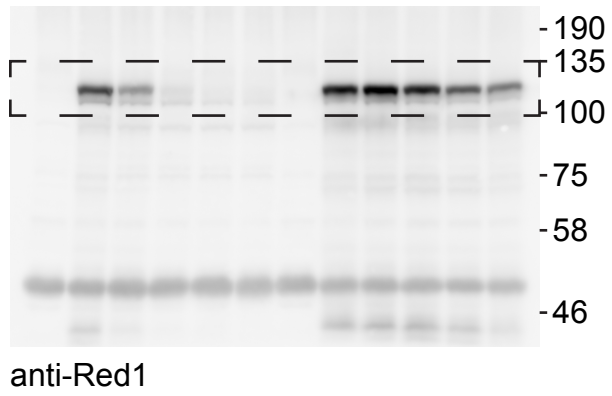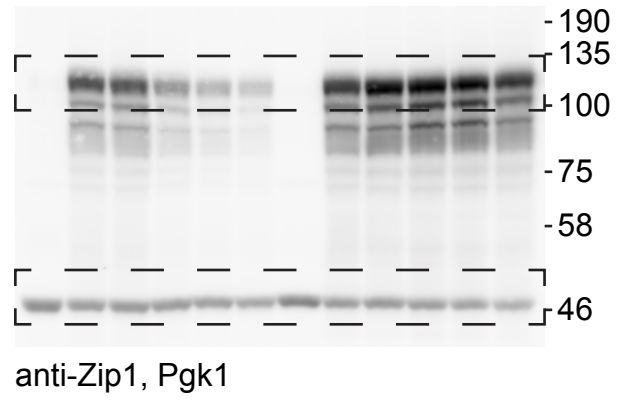

Fig. 7B. DBF4, dbf4<sup>S374A,T375A</sup>

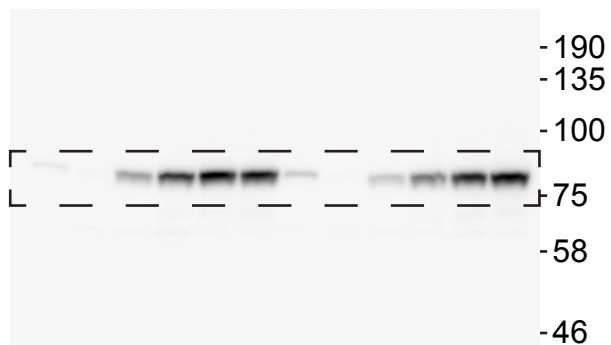

anti-Cdc5

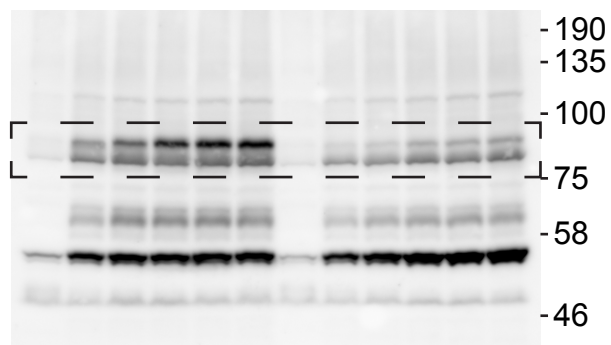

anti-Dbf4

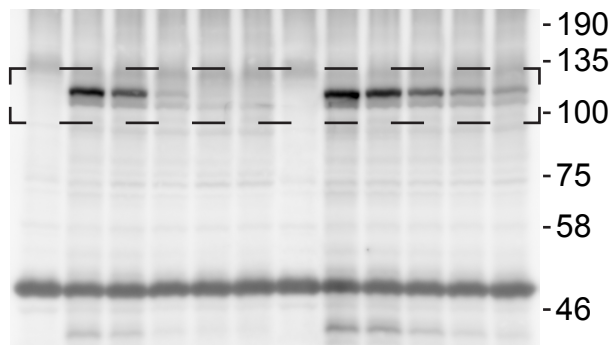

anti-Red1

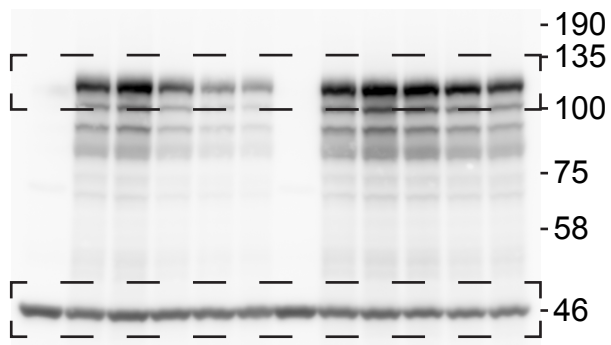

anti-Zip1, Pgk1

Fig. 7B. dbf4<sup>S374A</sup>

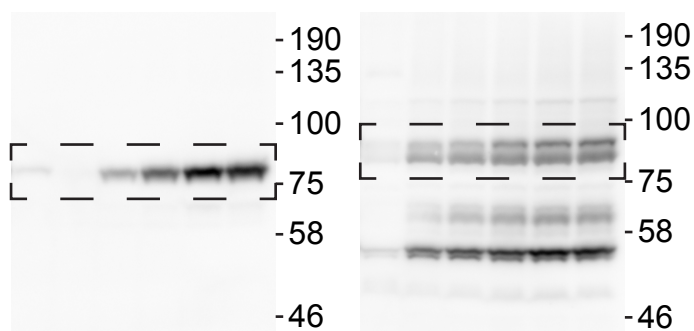

anti-Cdc5

anti-Dbf4

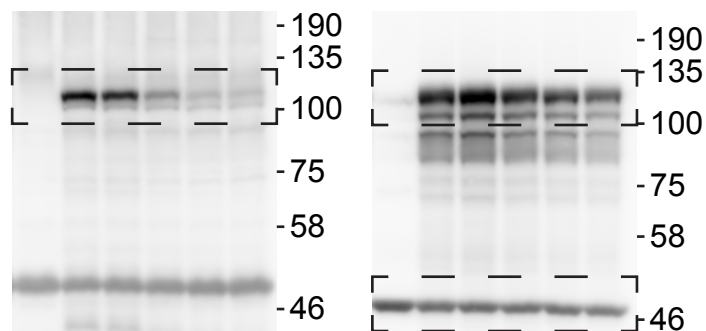

anti-Red1

anti-Zip1, Pgk1
