# Supplementary material
Source: PubMed Central journal article supplement (PMC5579384)

Fig 5A. rad51 dmc1 ndt80

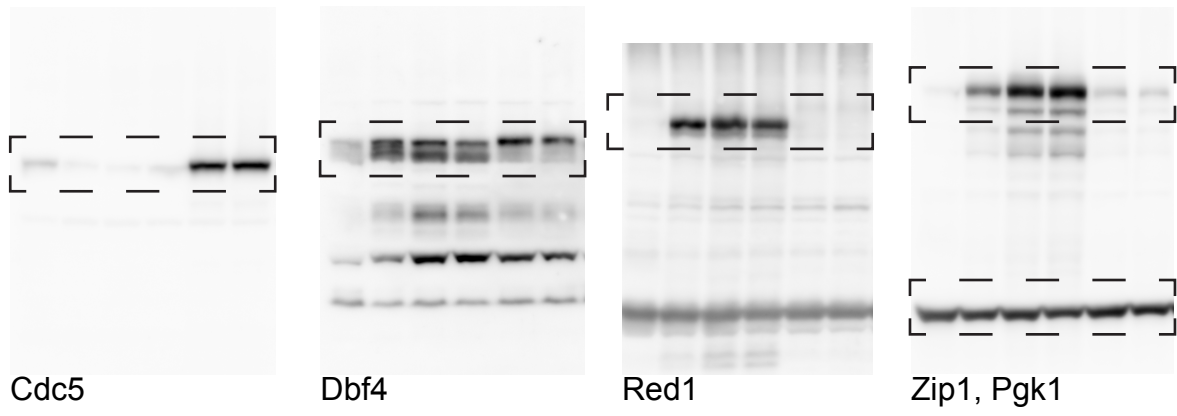

Fig. 5C. anti-Cdc5

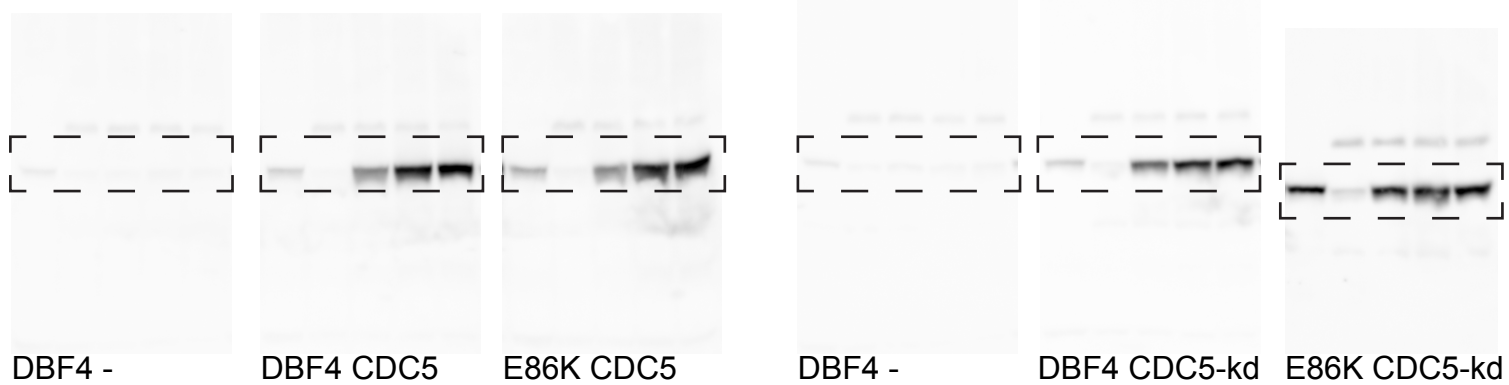

Fig. 5C. anti-Dbf4

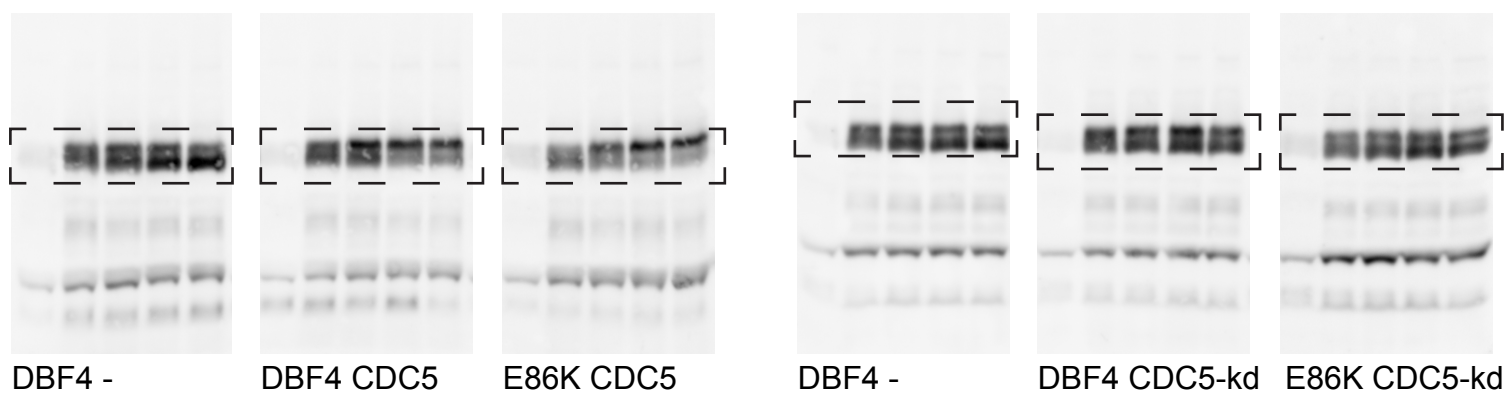

Fig. 5C. anti-Red1

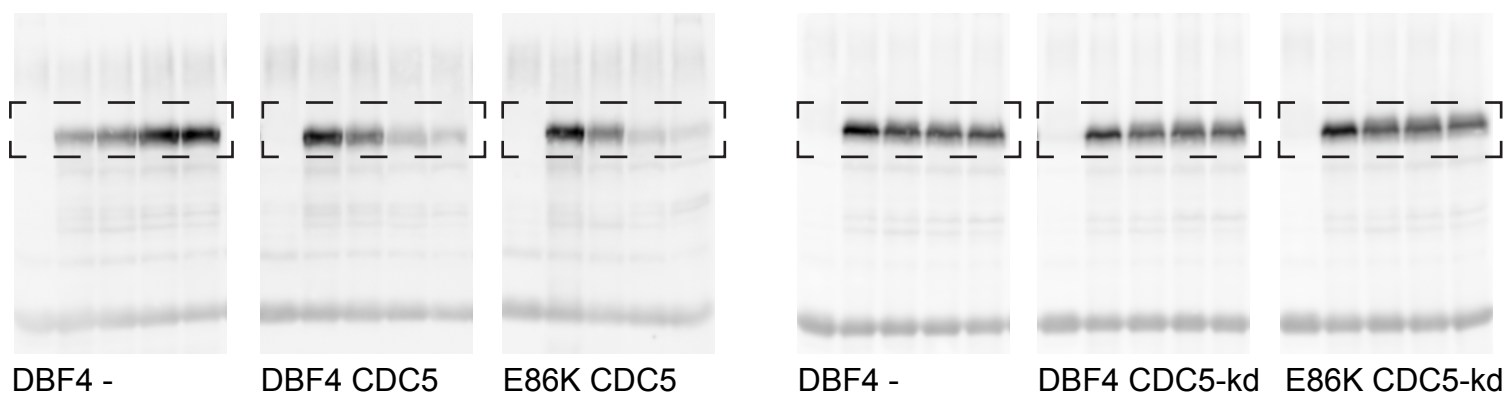

Fig. 5E. *ndt80* CDC5, anti-Dbf4

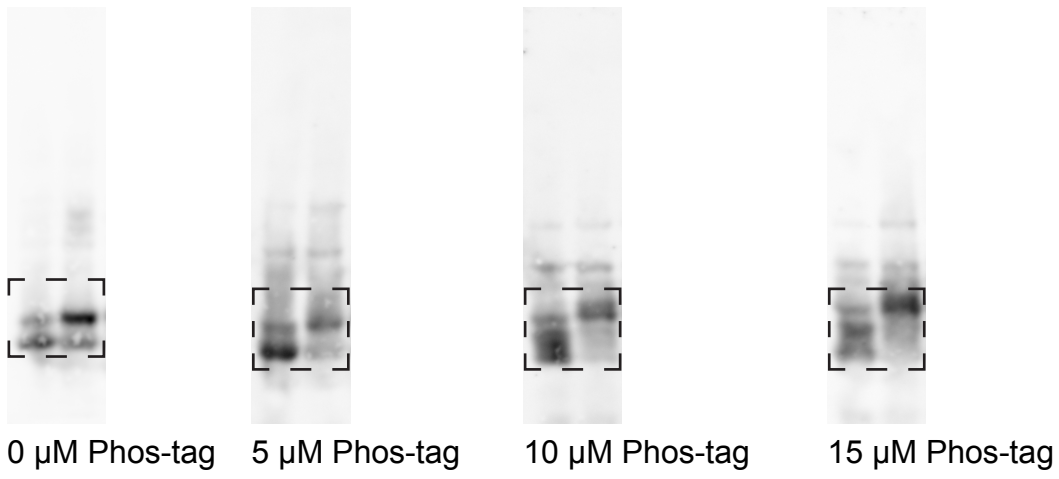

Supplement: EMBJ-36-2488-s007.pdf [file EMBJ-36-2488-s007.pdf]
